# Supplementary material for: A parsimonious approach for large-scale tracer test interpretation
Source: Springer Nature journal article supplement (doi:10.1007/s10040-021-02327-x), 2021-04-01
Supplement: MOESM1 [file 19026616]

**Tracer Residence Time Distribution database**  
**A parsimonious approach for large-scale tracer test interpretation**

V. Bailly-Comte (1), S. Pistre (2)

(1) BRGM, Montpellier Univ., Montpellier, France - v.bailly-comte@brgm.fr

(2) Hydrosiences Laboratory, UMR 5569

Hydrogeology Journal – Electronic Supplementary Material

| ID | Waterbody | Geological context          | Main drainage system | Injection point                         | Injection type | Detection point     | Detection type | Apparent length of flowpath | Mi    | Tracer           | Cmax    | Flow    | Recovery | tmean   | tmod     | hmod     | V                 | Date                                                      | Origin of data         |
|----|-----------|-----------------------------|----------------------|-----------------------------------------|----------------|---------------------|----------------|-----------------------------|-------|------------------|---------|---------|----------|---------|----------|----------|-------------------|-----------------------------------------------------------|------------------------|
|    |           |                             |                      |                                         |                |                     |                | m                           | g     |                  | ppb     | l/s     | %        | s       | s        | s-1      | m <sup>3</sup> /d |                                                           |                        |
| 1  |           |                             | Water colon          | Water colon with hydraulic constriction |                |                     |                | 4                           |       |                  |         | 1.1E-02 |          | 289     | 240      | 1.00E-02 | 1440              |                                                           |                        |
| 2  |           |                             | Water colon          | Water colon with hydraulic constriction |                |                     |                | 4                           |       |                  | 2.5E-03 |         |          | 1294    | 1068     | 1.94E-03 | 324               |                                                           |                        |
| 3  | GW        | Turbidites/Sandstones       | Fractured            | 90X                                     | Sinking stream | Rampoli Stream      | Surface stream | 117                         | 5000  | Uranine          | 1.7E-02 |         |          | 172800  | 3.61E-06 | 59       | 06/05/2006        | Vincenzi et al., 2009                                     |                        |
| 4  | GW        | Turbidites/Sandstones       | Fractured            | 200X                                    | Sinking stream | Rampoli Stream      | Surface stream | 135                         | 5000  | Uranine          | 1.0E-01 |         |          | 172800  | 1.72E-06 | 68       | 07/05/2006        | Vincenzi et al., 2009                                     |                        |
| 5  | GW        | Turbidites/Sandstones       | Fractured            | RW                                      | Sinking stream | Rampoli Stream      | Surface stream | 94                          | 5000  | Uranine          | 7.0E-00 |         |          | 86400   | 4.32E-06 | 94       | 08/05/2006        | Vincenzi et al., 2009                                     |                        |
| 6  | GW        | Turbidites/Sandstones       | Fractured            | 85SX                                    | Sinking stream | Rampoli Stream      | Surface stream | 373                         | 5000  | Uranine          | 2.6E-00 |         |          | 3888000 | 1.98E-07 | 8        | 09/05/2006        | Vincenzi et al., 2009                                     |                        |
| 7  | GW        | Turbidites/Sandstones       | Fractured            | 85SX                                    | Sinking stream | Rampoli Stream      | Surface stream | 373                         | 5000  | Uranine          | 5.0E-01 |         |          | 3888000 | 1.92E-07 | 9        | 10/05/2006        | Vincenzi et al., 2009                                     |                        |
| 8  | GW        | Turbidites/Sandstones       | Fractured            | 85SX                                    | Sinking stream | Rampoli Stream      | Surface stream | 373                         | 5000  | Uranine          | 2.3E-00 |         |          | 4320000 | 1.91E-07 | 7        | 11/05/2006        | Vincenzi et al., 2009                                     |                        |
| 9  | GW        | Turbidites/Sandstones       | Fractured            | 88SX                                    | Sinking stream | Rampoli Stream      | Surface stream | 403                         | 5000  | Uranine          | 6.7E-01 |         |          | 3888000 | 2.16E-07 | 9        | 12/05/2006        | Vincenzi et al., 2009                                     |                        |
| 10 | GW        | Turbidites/Sandstones       | Fractured            | 89SX                                    | Sinking stream | Rampoli Stream      | Surface stream | 403                         | 5000  | Uranine          | 5.7E-01 |         |          | 3888000 | 2.19E-07 | 9        | 13/05/2006        | Vincenzi et al., 2009                                     |                        |
| 11 | GW        | Turbidites/Sandstones       | Fractured            | 111SX                                   | Sinking stream | Rampoli Stream      | Surface stream | 468                         | 5000  | Uranine          | 2.9E-00 |         |          | 7962400 | 2.28E-07 | 5        | 14/05/2006        | Vincenzi et al., 2009                                     |                        |
| 12 | GW        | Turbidites/Sandstones       | Fractured            | 141SX                                   | Sinking stream | Rampoli Stream      | Surface stream | 203                         | 5000  | Uranine          | 5.0E-02 |         |          | 2246400 | 2.14E-07 | 8        | 15/05/2006        | Vincenzi et al., 2009                                     |                        |
| 13 | GW        | Turbidites/Sandstones       | Fractured            | 141DX                                   | Sinking stream | Rampoli Stream      | Surface stream | 203                         | 5000  | Uranine          | 3.3E-02 |         |          | 2592000 | 2.29E-07 | 7        | 16/05/2006        | Vincenzi et al., 2009                                     |                        |
| 14 | GW        | Turbidites/Sandstones       | Fractured            | 148SX                                   | Sinking stream | Rampoli Stream      | Surface stream | 206                         | 5000  | Uranine          | 6.7E-02 |         |          | 2592000 | 1.60E-07 | 7        | 17/05/2006        | Vincenzi et al., 2009                                     |                        |
| 15 | GW        | Turbidites/Sandstones       | Fractured            | OSTX                                    | Sinking stream | Rampoli Stream      | Surface stream | 91                          | 5000  | Uranine          | 1.0E-01 |         |          | 1468800 | 2.37E-07 | 5        | 18/05/2006        | Vincenzi et al., 2009                                     |                        |
| 16 | GW        | Limestone                   | Fractured            | P2                                      | Well           | PE-3                | Well           | 42                          | 50    |                  | 8.0E-00 |         | 57%      | 115200  | 10080    | 8.89E-06 | 36                |                                                           | Vereault 2003          |
| 17 | GW        | Limestone                   | Fractured            | P3                                      | Well           | PE-3                | Well           | 58                          | 360   |                  | 8.5E-01 |         | 98%      | 75600   | 64800    | 7.63E-06 | 77                |                                                           | Vereault 2003          |
| 18 | GW        | Fractured sedimentary rocks | Fractured            | 6                                       | Well           | 1                   | Well           | 30                          | 1870  | Bromide          | 3.0E+03 | 2.0E+00 | 56%      | 36000   | 5.78E-06 | 73       |                   | Carleton et al., 1999                                     |                        |
| 19 | GW        | Fractured sedimentary rocks | Fractured            | 2                                       | Well           | 1                   | Well           | 91                          | 3750  | Bromide          | 3.9E+03 | 2.0E+00 | 53%      | 72000   | 3.96E-06 | 110      |                   | Carleton et al., 1999                                     |                        |
| 20 | GW        | Fractured sedimentary rocks | Fractured            | 10                                      | Well           | 1                   | Well           | 183                         | 3880  | Bromide          | 1.6E+03 | 2.0E+00 | 34%      | 306000  | 2.37E-06 | 52       |                   | Carleton et al., 1999                                     |                        |
| 21 | GW        | Fractured sedimentary rocks | Fractured            | 20BR                                    | Well           | BRP2                | Well           | 30                          | 287   | Bromide          | 2.3E+03 | 2.1E-01 | 59%      | 49500   | 2.91E-06 | 54       |                   | Carleton et al., 1999                                     |                        |
| 22 | GW        | Fractured sedimentary rocks | Fractured            | BRP3                                    | Well           | 15BR                | Well           | 30                          | 471   | Bromide          | 7.5E+03 | 3.2E-01 | 37%      | 41100   | 3.24E-06 | 64       |                   | Carleton et al., 1999                                     |                        |
| 23 | GW        | Fractured sedimentary rocks | Fractured            | 41BR                                    | Well           | 16BR                | Well           | 30                          | 648   | Bromide          | 2.9E+04 | 8.8E-02 | 57%      | 29700   | 6.93E-06 | 89       |                   | Carleton et al., 1999                                     |                        |
| 24 | GW        | Fractured crystalline rock  | Fractured            | F5E9                                    | Well           | F5E9                | Well           | 36                          | 100   | Bromide          | 6.0E+00 | 4.8E-02 | 100%     | 126200  | 2.90E-06 | 25       | 1997              | Becker and Shapiro, 2000                                  |                        |
| 25 | GW        | Fractured crystalline rock  | Fractured            | F5E9                                    | Well           | F5E9                | Well           | 36                          | 100   | Bromide          | 7.0E+00 | 1.0E-01 | 100%     | 12860   | 1.14E-05 | 25       | 1997              | Becker and Shapiro, 2000                                  |                        |
| 26 | GW        | Fractured crystalline rock  | Fractured            | F5-6                                    | Well           | F5-6                | Well           | 12.7                        |       | Bromide          | 8.3E-03 | 41%     |          | 13230   | 3.39E-05 | 83       |                   | Raven et al., 1988, In Malozewski and Zuber, 1993         |                        |
| 27 | GW        | Fractured crystalline rock  | Fractured            | F5-6                                    | Well           | F5-6                | Well           | 12.7                        |       | Uranine          | 8.3E-03 | 41%     |          | 9260    | 2.96E-05 | 118      |                   | Raven et al., 1988, In Malozewski and Zuber, 1993         |                        |
| 28 | GW        | Fractured crystalline rock  | Fractured            | F5-6                                    | Well           | F5-15               | Well           | 12.7                        |       | Bromide          | 8.3E-03 | 57%     |          | 73060   | 7.80E-06 | 15       |                   | Raven et al., 1988, In Malozewski and Zuber, 1993         |                        |
| 29 | GW        | Fractured dolomite          | Fractured            |                                         | Well           |                     | Well           | 19.8                        |       |                  | 4.0E+00 | 89%     |          | 1480    | 8.13E-04 | 1156     |                   | Shapiro and Nicholas, 1989, In Malozewski and Zuber, 1993 |                        |
| 30 | GW        | Fractured sedimentary rocks | Fractured            | HKLU                                    | Well           | Lange Bramke Creek  | Surface stream | 550                         | 5000  | Bromide          | 5.5E+00 | 54%     |          | 604800  | 5.15E-07 | 79       |                   | Malozewski et al., 1999                                   |                        |
| 31 | GW        | Fractured sedimentary rocks | Fractured            | HKLU                                    | Well           | Lange Bramke Creek  | Surface stream | 550                         | 5000  | Bromide          | 2.8E+01 | 10%     |          | 155520  | 6.23E-07 | 306      |                   | Malozewski et al., 1999                                   |                        |
| 32 | GW        | Fractured chalk             | Fractured            | Pa CS                                   | Well           |                     | Well           | 6                           | 5.3   | Eosine           | 2.0E+02 |         |          | 5100    | 3.59E-05 | 77       | 02/07/1998        | Brayeur et al., 2004                                      |                        |
| 33 | GW        | Limestone                   | Karst                | STEP Massesgras                         | Dolina         | Source de Rouveyrol | Spring         | 4560                        | 250   | Uranine          | 6.1E+00 | 4.6E+02 | 137%     | 682560  | 612360   | 8.20E-06 | 643               | 30/06/2003                                                | PNRGC 2006             |
| 34 | GW        | Limestone                   | Karst                | Paltzuaran                              | Dolina         | Lesate Sp.          | Spring         | 3775                        | 7600  | LiCl             | 2.4E+02 | 6.2E+01 | 88%      | 335760  | 312000   | 1.35E-05 | 1045              | 28/03/2001                                                | Morales et al., 2007   |
| 35 | GW        | Limestone                   | Karst                | Paltzuaran                              | Dolina         | Lesate Sp.          | Spring         | 3775                        | 15400 | LiCl             | 4.1E+02 | 2.5E+01 | 86%      | 496800  | 436800   | 5.45E-06 | 747               | 15/12/2001                                                | Morales et al., 2007   |
| 36 | GW        | Limestone                   | Karst                | Ugitebu                                 | Dolina         | Ugitebu Sp.         | Spring         | 2050                        | 7000  | LiCl             | 3.1E+02 | 4.8E+01 | 95%      | 239820  | 236400   | 1.37E-05 | 749               | 28/03/2001                                                | Morales et al., 2007   |
| 37 | GW        | Limestone                   | Karst                | Etakbaru                                | Dolina         | Ugitebu Sp.         | Spring         | 2050                        | 471   | LiCl             | 7.9E+02 | 1.4E+01 | 90%      | 451500  | 402180   | 4.67E-06 | 440               | 15/12/2001                                                | Morales et al., 2007   |
| 38 | GW        | Limestone                   | Karst                | Etakbaru                                | Dolina         | Ugitebu Sp.         | Spring         | 2050                        | 36400 | LiCl             | 1.9E+03 | 7.0E+00 | 81%      | 843960  | 769200   | 2.89E-06 | 430               | 04/08/2001                                                | Morales et al., 2007   |
| 39 | GW        | Limestone                   | Karst                | Larreta                                 | Dolina         | Trakmail Sp.        | Spring         | 2600                        | 30000 | LiCl             | 2.3E+03 | 8.6E+00 | 74%      | 581880  | 486000   | 6.33E-06 | 262               | 27/09/2002                                                | Morales et al., 2007   |
| 40 | GW        | Limestone                   | Karst                | Vene                                    | Karst conduit  | Isanaka             | Spring         | 6100                        | 3000  | Uranine          | 3.2E+01 | 2.0E+02 | 85%      | 729000  | 415440   | 2.51E-06 | 1269              | 21/01/2000                                                | Ladouceur et al., 2008 |
| 41 | GW        | Limestone                   | Karst                | Hollon Cave                             | Karst conduit  | Sleibach Sp.        | Spring         | 2500                        | 200   | Uranine          | 9.3E+01 | 1.7E+02 | 99%      | 353880  | 8.08E-06 | 610      | 26/02/2005        | Goldschneider et al., 2001                                |                        |
| 42 | GW        | Limestone                   | Karst                | Rinquelle                               | Karst conduit  | Rinquelle           | Spring         |                             |       |                  | 2.0E+03 |         |          | 9970    | 4.00E-05 |          |                   | Leubundgut, 1998                                          |                        |
| 43 | GW        | Limestone                   | Karst                | Rinquelle                               | Karst conduit  | Rinquelle           | Spring         |                             |       |                  | 4.4E+03 |         |          | 134640  | 3.03E-05 |          |                   | mai-93                                                    |                        |
| 44 | GW        | Limestone                   | Karst                | Rinquelle                               | Karst conduit  | Rinquelle           | Spring         |                             |       |                  | 7.2E+03 |         |          | 195120  | 1.96E-05 |          |                   | juil.-93                                                  |                        |
| 45 | GW        | Limestone                   | Karst                | Perte des Pradelles                     | Sinkhole       | Source du Verlenque | Spring         | 2650                        | 50    | Eosine gamma     | 2.3E+00 |         | 42%      | 637920  | 250500   | 5.12E-06 | 914               | 14/11/2002                                                | PNRGC 2006             |
| 46 | GW        | Limestone                   | Karst                | Aven du col de la Fagette               | Sinkhole       | Beldioze            | Spring         | 14450                       | 500   | Uranine          | 4.0E-01 |         | 8%       | 1168200 | 99840    | 2.44E-06 | 1250              | 08/04/2003                                                | PNRGC 2006             |
| 47 | GW        | Limestone/Dolostone         | Karst                | Aven de la carriere du Clos-Haut        | Sinkhole       | Source de Beldioze  | Spring         | 15183                       | 400   | Uranine          | 3.7E-01 |         | 4%       | 98540   | 449960   | 5.00E-06 | 1543              | 22/11/2004                                                | PNRGC 2006             |
| 48 | GW        | Limestone/Dolostone         | Karst                | Aven de la carriere du Clos-Haut        | Sinkhole       | Source de Fontmaure | Spring         | 14362                       | 400   | Uranine          | 1.3E-01 |         | 2%       | 1144440 | 1085040  | 3.23E-06 | 1144              | 22/11/2004                                                | PNRGC 2006             |
| 49 | GW        | Limestone                   | Karst                | Fontaine de Nimes                       | Sinkhole       | Fontaine de Nimes   | Spring         | 2250                        | 3000  | Sulfurhodamine G | 8.2E+00 | 3.9E+02 | 45%      | 2160000 | 1563840  | 2.37E-06 | 124               | 10/03/2006                                                | Maréchal et al., 2010  |
| 50 | GW        | Limestone                   | Karst                | Aven du pont de la République           | Sinkhole       | Fontaine de Nimes   | Spring         | 2710                        | 12500 | naphtionate      | 1.4E+02 | 3.9E+02 | 69%      | 1382400 | 803520   | 6.51E-06 | 291               | 10/03/2006                                                | Maréchal et al., 2010  |
| 51 | GW        | Limestone/Dolostone         | Karst                | Llanos del Pouzeu                       | Sinkhole       | Cueva del Gato      | Spring         | 5200                        | 3000  | Eosine gamma     | 8.1E-01 | 4.4E+03 | 10%      | 208800  | 1186E-05 | 2152     | 25/11/2002        | Andreo, B. et al., 2004                                   |                        |
| 52 | GW        | Limestone/Dolostone         | Karst                | Llanos de Libar                         | Sinkhole       | Benajos             | Spring         | 5000                        | 3000  | Uranine          | 7.3E-01 | 1.4E+01 | 85%      | 244200  | 5.95E-06 | 870      | 25/11/2002        | Andreo, B. et al., 2004                                   |                        |
| 53 | GW        | Limestone/Dolostone         | Karst                | Llanos de Libar                         | Sinkhole       | Jimera de Libar     | Spring         | 5000                        | 3000  | Uranine          | 2.3E+01 | 7.0E+02 | 24%      | 234000  | 2.24E-05 | 1846     | 25/11/2002        | Andreo, B. et al., 2004                                   |                        |
| 54 | GW        | Limestone/Dolostone         | Karst                | Simá del Republicano                    | Sinkhole       | Charco del Mabor    | Spring         | 14500                       | 3000  | Sulfurhodamine G | 8.5E-01 | 9.3E+03 | 74%      | 482400  | 3.58E-06 | 2597     | 25/11/2002        | Andreo, B. et al., 2004                                   |                        |
| 55 | GW        | Limestone                   | Karst                | Boluntulo                               | Sinking stream | Olaide Sp.          | Spring         | 2750                        | 32700 | LiCl             | 4.8E+02 | 8.7E+01 | 94%      | 429300  | 399600   | 8.34E-06 | 595               | 14/12/1997                                                | Morales et al., 2007   |
| 56 | GW        | Limestone                   | Karst                | Boluntulo                               | Sinking stream | Olaide Sp.          | Spring         | 2750                        | 9800  | LiCl             | 1.4E+02 | 6.5E+01 | 83%      | 579780  | 546300   | 6.74E-06 | 435               | 11/04/1995                                                | Morales et al., 2007   |
| 57 | GW        | Limestone                   | Karst                | Boluntulo                               | Sinking stream | Olaide Sp.          | Spring         | 2750                        | 13215 | LiCl             | 1.7E+02 | 8.8E+01 | 86%      | 808200  | 709200   | 4.67E-06 | 335               | 17/06/1996                                                | Morales et al., 2007   |
| 58 | GW        | Limestone                   | Karst                | Bollarko Errota                         | Sinking stream | Rekalde Sp.         | Spring         | 1800                        | 13700 | LiCl             | 1.2E+03 | 2.2E+01 | 78%      | 135508  | 111000   | 1.62E-05 | 1401              | 12/04/2002                                                | Morales et al., 2007   |
| 59 | GW        | Limestone                   | Karst                | Bollarko Errota                         | Sinking stream | Rekalde Sp.         | Spring         | 1800                        | 13700 | LiCl             | 8.8E+02 | 5.8E+00 | 15%      | 135480  | 118200   | 1.50E-05 | 1316              | 12/04/2002                                                | Morales et al., 2007   |
| 60 | GW        | Limestone                   | Karst                | Bollarko Errota                         | Sinking stream | Rekalde Sp.         | Spring         | 1800                        | 16500 | LiCl             | 3.1E+03 | 1.0E+01 | 76%      | 187260  | 161400   | 1.50E-05 | 950               | 19/04/2002                                                | Morales et al., 2007   |
| 61 | GW        | Limestone                   | Karst                | Bollarko Errota                         | Sinking stream | Rekalde Sp.         | Spring         | 1800                        | 16500 | LiCl             | 2.1E+03 | 2.5E-04 | 14%      | 203820  | 183000   | 1.37E-05 | 864               | 19/04/2002                                                | Morales et al., 2007   |
| 62 | GW        | Limestone                   | Karst                | Bollarko Errota                         | Sinking stream | Re                  |                |                             |       |                  |         |         |          |         |          |          |                   |                                                           |                        |

|     |    |                     |                |                                        |                 |                                          |        |       |       |                     |         |         |         |          |          |            |               |                       |                                    |                |
|-----|----|---------------------|----------------|----------------------------------------|-----------------|------------------------------------------|--------|-------|-------|---------------------|---------|---------|---------|----------|----------|------------|---------------|-----------------------|------------------------------------|----------------|
| 103 | GW | Limestone           | Karst          | Bassin de l'A75                        | Retention basin | Source de Boudoulou                      | Spring | 5780  |       | Uranine             | 172     | 60%     | 1209600 | 1010880  | 2.4E-06  | 494        | 14/06/2013    | de la Bernardie, 2013 |                                    |                |
| 104 | GW | Limestone           | Karst          | Bassin de l'A75                        | Retention basin | Source de Boudoulou                      | Spring | 5780  |       | Uranine             | 118     | 29%     | 1736640 | 1632960  | 2.3E-06  | 306        | 24/07/2013    | de la Bernardie, 2013 |                                    |                |
| 105 | GW | Limestone           | Karst          | St Etienne de Naucoules                |                 | Source de Dragonniere                    | Spring | 2455  |       | Sulfurhodamine B    | 118     | 23%     | 570240  | 544320   | 7.7E-06  | 390        | 23/04/2013    | de la Bernardie, 2013 |                                    |                |
| 106 | GW | Limestone           | Karst          | St Etienne de Naucoules                |                 | Source de Dragonniere                    | Spring | 2455  |       | Uranine             | 118     | 6%      | 1294000 | 1200960  | 3.8E-07  | 177        | 25/07/2013    | de la Bernardie, 2013 |                                    |                |
| 107 | GW | Limestone           | Karst          | Gouffre Cathy                          | Sinking stream  | Montant Sp.                              | Spring | 14400 | 6500  | Uranine             | 2.0E+00 | 4.5E+03 | 11%     | 601200   | 450000   | 1.26E-05   | 2765          | 15/04/2000            | Perrin and Luetscher, 2008         |                |
| 108 | GW | Limestone           | Karst          | Gouffre Combe Trébillé                 | Sinking stream  | Montant Sp.                              | Spring | 10500 | 5000  | Sulfurhodamine G    | 2.7E+00 | 4.5E+03 | 17%     | 658800   | 428400   | 1.43E-05   | 2118          | 15/04/2000            | Perrin and Luetscher, 2008         |                |
| 109 | GW | Limestone           | Karst          | Gouffre Masse                          | Sinking stream  | Aubonne Sp.                              | Spring | 27400 | 8000  | Uranine             | 6.3E+00 | 1.8E+03 | 22%     | 813600   | 684000   | 6.26E-06   | 3461          | 20/04/2002            | Perrin and Luetscher, 2008         |                |
| 110 | GW | Limestone           | Karst          | Gouffre Masse                          | Sinking stream  | Tolèure Sp.                              | Spring | 25600 | 8000  | Uranine             | 5.6E+00 | 1.3E+03 | 35%     | 900000   | 790000   | 2.50E-06   | 2793          | 20/04/2002            | Perrin and Luetscher, 2008         |                |
| 111 | GW | Limestone           | Karst          | Gouffre Masse                          | Sinking stream  | Montant Sp.                              | Spring | 17500 | 8000  | Uranine             | 8.9E+00 | 1.5E+03 | 11%     | 925200   | 799200   | 1.18E-06   | 177           | 20/04/2002            | Perrin and Luetscher, 2008         |                |
| 112 | GW | Limestone           | Karst          | Gouffre Dag's Bar                      | Sinking stream  | Aubonne Sp.                              | Spring | 23600 | 6000  | Eosine              | 5.4E+00 | 1.8E+03 | 28%     | 763200   | 655200   | 5.63E-06   | 3112          | 20/04/2002            | Perrin and Luetscher, 2008         |                |
| 113 | GW | Limestone           | Karst          | Gouffre Dag's Bar                      | Sinking stream  | Tolèure Sp.                              | Spring | 21800 | 6000  | Eosine              | 5.1E+00 | 2.8E+03 | 42%     | 824400   | 630000   | 5.67E-06   | 2990          | 20/04/2002            | Perrin and Luetscher, 2008         |                |
| 114 | GW | Limestone           | Karst          | Gouffre Dag's Bar                      | Sinking stream  | Montant Sp.                              | Spring | 13700 | 6000  | Eosine              | 8.2E+00 | 1.5E+03 | 17%     | 903600   | 774000   | 1.21E-05   | 1529          | 20/04/2002            | Perrin and Luetscher, 2008         |                |
| 115 | GW | Limestone           | Karst          | Gouffre Pierre-Pleines                 | Sinking stream  | Aubonne Sp.                              | Spring | 17000 | 10000 | naphthionate        | 6.7E+00 | 1.8E+03 | 21%     | 860400   | 716400   | 5.58E-06   | 2050          | 20/04/2002            | Perrin and Luetscher, 2008         |                |
| 116 | GW | Limestone           | Karst          | Gouffre Pierre-Pleines                 | Sinking stream  | Tolèure Sp.                              | Spring | 10000 | 10000 | naphthionate        | 5.5E+00 | 1.3E+03 | 42%     | 1004000  | 763200   | 1.64E-06   | 1799          | 20/04/2002            | Perrin and Luetscher, 2008         |                |
| 117 | GW | Limestone           | Karst          | Gouffre Trois Châlets                  | Sinking stream  | Aubonne Sp.                              | Spring | 18200 | 5000  | Sulfurhodamine G    | 4.4E+00 | 1.8E+03 | 43%     | 964800   | 727200   | 3.58E-06   | 2162          | 20/04/2002            | Perrin and Luetscher, 2008         |                |
| 118 | GW | Limestone           | Karst          | Gouffre Trois Châlets                  | Sinking stream  | Tolèure Sp.                              | Spring | 16300 | 5000  | Sulfurhodamine G    | 4.3E+00 | 1.3E+03 | 50%     | 990000   | 774000   | 2.15E-06   | 1820          | 20/04/2002            | Perrin and Luetscher, 2008         |                |
| 119 | GW | Limestone           | Karst          | Gouffre Trois Châlets                  | Sinking stream  | Montant Sp.                              | Spring | 4650  | 5000  | Sulfurhodamine G    | 2.6E+02 | 9.0E+01 | 66%     | 457200   | 421200   | 6.98E-06   | 954           | 20/04/2002            | Perrin and Luetscher, 2008         |                |
| 120 | GW | Limestone           | Karst          | SPI3                                   | Sinking stream  | Shuffling Sp.                            | Spring | 200   | 200   | Uranine             | 2.7E+02 | 5.0E+00 | 43%     | 57600    | 1.57E-05 |            |               | 19/09/1996            | Wu et al., 2008                    |                |
| 121 | GW | Limestone           | Karst          | Swallow hole 1                         | Sinking stream  | Spring 1                                 | Spring | 3000  | 500   | Uranine             | 2.2E+01 | 2.2E+02 | 73%     | 192000   | 1.93E-05 |            |               | 02/10/1995            | Nguyet and Goldscheider, 2006      |                |
| 122 | GW | Limestone           | Karst          | Swallow hole 2                         | Sinking stream  | Spring 2                                 | Spring | 1750  | 500   | Rhodamine B         | 1.3E+03 | 7.0E+01 | 74%     | 10800    | 2.46E-04 | 14000      |               |                       | Nguyet and Goldscheider, 2006      |                |
| 123 | GW | Limestone           | Karst          | Jargeau                                | Sinking stream  | Source du Bouillon                       | Spring | 15000 | 1000  | Uranine             | 5.7E-01 | 3.0E+02 | 2%      | 406800   | 359340   | 8.14E-06   | 3607          |                       | Joodi et al., 2010                 |                |
| 124 | GW | Limestone           | Karst          | Jargeau                                | Sinking stream  | Source du Bouillon                       | Spring | 15000 | 2000  | Uranine             | 3.9E-01 | 3.0E+02 | 1%      | 363600   | 308700   | 8.36E-06   | 4198          |                       | Joodi et al., 2010                 |                |
| 125 | GW | Limestone           | Karst          | Jargeau                                | Sinking stream  | Source du Bouillon                       | Spring | 15000 | 2000  | Uranine             | 5.6E-01 | 3.0E+02 | 1%      | 435600   | 376140   | 6.00E-06   | 3446          |                       | Joodi et al., 2010                 |                |
| 126 | GW | Limestone           | Karst          | Jargeau                                | Sinking stream  | Source du Bouillon                       | Spring | 15000 | 1000  | Uranine             | 7.0E-02 | 7.0E+02 | 1%      | 385200   | 313200   | 7.42E-06   | 4138          |                       | Joodi et al., 2010                 |                |
| 127 | GW | Limestone           | Karst          | Jargeau                                | Sinking stream  | Source du Bouillon                       | Spring | 15000 | 1000  | Uranine             | 1.0E-01 | 4.7E+02 | 1%      | 352800   | 284400   | 7.23E-06   | 4557          |                       | Joodi et al., 2010                 |                |
| 128 | GW | Limestone           | Karst          | Perte et Fracas                        | Sinking stream  | Source de la Fou de Sainte Anne d'Evenos | Spring | 2400  | 10000 | Aminocacide         | 5.1E+02 | 3.3E+02 | 100%    | 72240    | 1.69E-05 | 2870       |               |                       | Arfifi et al., 2011                |                |
| 129 | GW | Limestone           | Karst          | Lost River Blue Hole                   | Sinking stream  | Lost River cave system                   | Spring | 8000  | 476   | Rhodamine WT        | 1.9E+01 | 1.8E+03 | 101%    | 84299    | 79200    | 6.85E-05   | 8727          |                       | Field and Pinsky, 2000             |                |
| 130 | GW | Limestone           | Karst          | Forge Valley swallow-holes             | Sinking stream  | Irton (PWS) new well (B) TA 004 840      | Well   | 1950  | 286   | Uranine             | 1.2E+03 | 1.7E-02 | 49%     | 15500    | 1409E-06 | 11232      |               | 21/05/2002            | Foley, 2012                        |                |
| 131 | GW | Limestone           | Karst          | Fourtilles swallow hole                | Sinking stream  | Uradouin Sp.                             | Spring | 1000  | 1000  | Uranine             | 2.6E+01 | 1.2E+02 |         | 173480   | 1.23E-04 | 0          |               | 29/06/2005            | Perrin et al., 2008                |                |
| 132 | GW | Limestone           | Karst          | Timnaz                                 | Sinking stream  | Pont de Pierre Sp.                       | Spring | 6250  | 773   | Uranine             | 100%    | 1993680 | 1693400 | 1.87E-06 | 319      | 23/10/1983 | Mondain, 1991 |                       |                                    |                |
| 133 | GW | Limestone           | Karst          | Timnaz                                 | Sinking stream  | Pont de Pierre Sp.                       | Spring | 6250  | 1016  | Uranine             | 100%    | 240120  | 153700  | 1.79E-05 | 3513     | 24/09/1994 | Mondain, 1991 |                       |                                    |                |
| 134 | GW | Limestone           | Karst          | Ruisseau de Serre a Campagnac          | Surface stream  | Courtinaux 1                             | Spring | 1638  | 100   | Eosine gamma        | 4.1E-01 | 1.0E+02 | 65%     | 114840   | 90720    | 4.03E-05   | 1560          | 19/11/2002            | PhRG 2006                          |                |
| 135 | GW | Limestone           | Karst          | Bange l'Eau Morte karst system, France |                 |                                          |        |       |       |                     |         |         |         | 3.2E-01  |          | 423648     | 5.34E-06      |                       | 17/09/1996                         | Lepiller, 2001 |
| 136 | GW | Limestone           | Karst          | Bange l'Eau Morte karst system, France |                 |                                          |        |       |       |                     |         |         |         | 7.2E-01  |          | 151440     | 1.19E-05      |                       | 02/10/1995                         | Lepiller, 2001 |
| 137 | GW | Limestone           | Karst          | Bange l'Eau Morte karst system, France |                 |                                          |        |       |       |                     |         |         |         | 8.5E-01  |          | 157104     | 1.29E-05      |                       | 14/05/1992                         | Lepiller, 2001 |
| 138 | GW | Limestone           | Karst          | Bange l'Eau Morte karst system, France |                 |                                          |        |       |       |                     |         |         |         | 2.0E+02  |          | 61488      | 3.13E-05      |                       | 04/06/1991                         | Lepiller, 2001 |
| 139 | GW | Limestone           | Karst          | Bange l'Eau Morte karst system, France |                 |                                          |        |       |       |                     |         |         |         | 5.8E+02  |          | 41724      | 4.70E-05      |                       | 01/11/1990                         | Lepiller, 2001 |
| 140 | GW | Limestone/Dolostone | Karst          | Perte des Crozes                       | Sinking stream  | Source de Lestang                        | Spring | 2120  | 6000  | Iodure de potassium | 6.8E-01 | 2.0E+02 | 286%    | 407160   | 300000   | 1.17E-05   | 309           | 18/11/2003            | PhRG 2006                          |                |
| 141 | GW | Limestone/Dolostone | Karst          | Aven d'Espare                          | Sinking stream  | Fontaines d'Espare                       | Spring | 1700  | 130   | Uranine             | 1.3E-01 | 1.3E+01 | 2%      | 434160   | 367920   | 2.56E-05   | 399           | 06/05/2004            | PhRG 2006                          |                |
| 142 | GW | Limestone/Dolostone | Karst          | Aven de Cassagnes                      | Sinking stream  | Source de Mayrhain                       | Spring | 1740  | 2500  | Eosine gamma        | 4.4E+02 | 2.3E+02 | 111%    | 167400   | 91080    | 3.98E-05   | 1651          | 24/05/2004            | PhRG 2006                          |                |
| 143 | GW | Limestone/Dolostone | Karst          | Perte de la fontaine de St Urbain      | Sinking stream  | Source de Beldioce                       | Spring | 16631 | 1000  | Sulfurhodamine G    | 8.1E-01 | 2.5E+02 | 10%     | 1377220  | 968040   | 1.75E-06   | 1484          | 22/11/2004            | PhRG 2006                          |                |
| 144 | GW | Limestone/Dolostone | Karst          | Perte de la fontaine de St Urbain      | Sinking stream  | Source de Fontmaure                      | Spring | 15776 | 1000  | Sulfurhodamine G    | 1.8E-01 | 2.3E+02 | 2%      | 1685160  | 1241640  | 4.00E-07   | 2698          | 22/11/2004            | PhRG 2006                          |                |
| 145 | GW | Limestone/Dolostone | Karst          | Perte du Souci                         | Sinking stream  | Source de Roumeyrol                      | Spring | 8650  | 500   | Uranine             | 6.7E+00 | 2.5E+02 | 22%     | 317160   | 281160   | 3.69E-05   | 1058          | 18/11/2002            | PhRG 2006                          |                |
| 146 | GW | Limestone/Dolostone | Karst          | Perte du Souci                         | Sinking stream  | Source de Roumeyrol                      | Spring | 250   | 250   | Aminocacide         | 4.3E+02 | 2.5E+02 | 29%     | 81904    | 609780   | 1.56E-05   | 1082          | 15/07/2003            | PhRG 2006                          |                |
| 147 | GW | Limestone/Dolostone | Karst          | Well                                   | Well            | Quarry Spring                            | Spring | 450   | 0.7   | Rhodamine WT        | 2.4E+00 | 1.4E+01 | 96%     | 37900    | 22500    | 4.94E-05   | 1728          |                       | Field and Pinsky, 2000             |                |
| 148 | GW | Limestone/Dolostone | Karst          | Well                                   | Well            | Quarry Spring                            | Spring | 450   | 717   | Rhodamine WT        | 8.5E+01 | 2.3E+01 | 28%     | 27950    | 16200    | 9.74E-05   | 2400          |                       | Field and Pinsky, 2000             |                |
| 149 | GW | Chalk               | Karst          | Bébec sinkhole                         | Sinking stream  | Hannetot                                 | Spring | 3300  |       | Uranine             | 4.7E-01 | 94%     | 84960   | 81945    | 3.10E-05 | 3479       | 01/02/2000    | Massie et al., 2006   |                                    |                |
| 150 | GW | Chalk               | Karst          | Bébec sinkhole                         | Sinking stream  | Hannetot                                 | Spring | 3300  |       | Uranine             | 3.4E-01 | 88%     | 110880  | 103425   | 2.56E-05 | 2757       | 01/10/1999    | Massie et al., 2006   |                                    |                |
| 151 | SW | Surface stream      | Antietam Creek | Antietam Creek                         | Surface stream  | Antietam Creek                           | Spring | 9600  | 464   |                     | 8.9E+01 | 1.2E+03 | 87%     | 11520    | 2.65E-04 |            |               |                       | Jobson, 1996 and references herein |                |
| 152 | SW | Surface stream      | Antietam Creek | Antietam Creek                         | Surface stream  | Antietam Creek                           | Spring | 9600  | 464   |                     | 2.9E+01 | 1.2E+03 | 76%     | 46800    | 9.90E-05 | 17723      |               |                       | Jobson, 1996 and references herein |                |
| 153 | SW | Surface stream      | Antietam Creek | Antietam Creek                         | Surface stream  | Antietam Creek                           | Spring | 21500 | 464   |                     | 5.0E+00 | 1.6E+03 | 43%     | 153000   | 3.99E-05 | 12141      |               |                       | Jobson, 1996 and references herein |                |
| 154 | SW | Surface stream      | Antietam Creek | Antietam Creek                         | Surface stream  | Antietam Creek                           | Spring | 29600 | 464   |                     | 2.2E+00 | 1.8E+03 | 32%     | 241200   | 2.68E-05 | 10603      |               |                       | Jobson, 1996 and references herein |                |
| 155 | SW | Surface stream      | Antietam Creek | Antietam Creek                         | Surface stream  | Antietam Creek                           | Spring | 2600  | 2474  |                     | 3.5E+02 | 5.1E+03 | 106%    | 4860     | 6.82E-04 | 46222      |               |                       | Jobson, 1996 and references herein |                |
| 156 | SW | Surface stream      | Antietam Creek | Antietam Creek                         | Surface stream  | Antietam Creek                           | Spring | 2474  | 2474  |                     | 4.9E+02 | 4.8E+03 | 102%    | 15800    | 2.86E-04 | 41891      |               |                       | Jobson, 1996 and references herein |                |
| 157 | SW | Surface stream      | Antietam Creek | Antietam Creek                         | Surface stream  | Antietam Creek                           | Spring | 21500 | 2474  |                     | 4.9E+01 | 7.4E+03 | 93%     | 57240    | 1.57E-04 | 32453      |               |                       | Jobson, 1996 and references herein |                |
| 158 | SW | Surface stream      | Antietam Creek | Antietam Creek                         | Surface stream  | Antietam Creek                           | Spring | 29600 | 2474  |                     | 2.4E+01 | 7.8E+03 | 66%     | 84240    | 1.16E-04 | 30359      |               |                       | Jobson, 1996 and references herein |                |
| 159 | SW | Surface stream      | Antietam Creek | Antietam Creek                         | Surface stream  | Antietam Creek                           | Spring | 42200 | 2474  |                     | 1.4E+01 | 8.5E+03 | 61%     | 119520   | 7.62E-05 | 30506      |               |                       | Jobson, 1996 and references herein |                |
| 160 | SW | Surface stream      | Antietam Creek | Antietam Creek                         | Surface stream  | Antietam Creek                           | Spring | 49200 | 2474  |                     | 8.5E+00 | 1.0E-04 | 49%     | 136800   | 7.16E-05 | 31074      |               |                       | Jobson, 1996 and references herein |                |
| 161 | SW | Surface stream      | Antietam Creek | Antietam Creek                         | Surface stream  | Antietam Creek                           | Spring | 59200 | 2474  |                     | 4.3E+00 | 1.8E+03 | 47%     | 155880   | 6.61E-05 | 32813      |               |                       | Jobson, 1996 and references herein |                |
| 162 | SW | Surface stream      | Antietam Creek | Antietam Creek                         | Surface stream  | Antietam Creek                           | Spring | 66800 | 2474  |                     | 5.1E+00 | 1.3E-04 | 44%     | 170640   | 6.01E-05 | 33823      |               |                       | Jobson, 1996 and references herein |                |
| 163 | SW | Surface stream      | Antietam Creek | Antietam Creek                         | Surface stream  | Antietam Creek                           | Spring | 2600  | 928   |                     | 1.1E+02 | 2.4E+03 | 102%    | 9720     | 2.90E-04 | 23111      |               |                       | Jobson, 1996 and references herein |                |
| 164 | SW | Surface stream      | Antietam Creek | Antietam Creek                         | Surface stream  | Antietam Creek                           | Spring | 9600  | 928   |                     | 5.0E+01 | 2.4E+03 | 93%     | 34200    | 1.38E-04 | 24253      |               |                       | Jobson, 1996 and references herein |                |
| 165 | SW | Surface stream      | Antietam Creek | Antietam Creek                         | Surface stream  | Antietam Creek                           | Spring | 21500 | 928   |                     | 1.1E+01 | 3.4E+03 | 63%     | 9640     | 6.58E-05 | 18832      |               |                       | Jobson, 1996 and references herein |                |
| 166 | SW | Surface stream      | Antietam Creek | Antietam Creek                         | Surface stream  | Antietam Creek                           | Spring | 928   | 1546  |                     | 1.9E+00 | 5.6E+03 | 92%     | 144360   | 5.61E-05 | 17116      |               |                       | Jobson, 1996 and references herein |                |
| 167 | SW | Surface stream      | Antietam Creek | Antietam Creek                         | Surface stream  | Antietam Creek                           | Spring | 12600 | 1546  |                     | 2.2E+01 | 4.5E+03 | 69%     | 49680    | 9.32E-05 | 21913      |               |                       | Jobson, 1996 and references herein |                |
| 168 | SW | Surface stream      | Antietam Creek | Antietam Creek                         | Surface stream  | Antietam Creek                           | Spring | 19600 | 1546  |                     | 1.3E+01 | 5.3E+03 | 66%     | 76320    | 6.85E-05 | 22189      |               |                       | Jobson, 1996 and references herein |                |
| 169 | SW | Surface stream      | Antietam Creek | Antietam Creek                         | Surface stream  | Antietam Creek                           | Spring | 29600 | 1546  |                     | 8.2E+00 | 6.4E+03 | 63%     | 104400   | 5.44E-05 | 24497      |               |                       | Jobson, 1996 and references herein |                |
| 170 | SW | Surface stream      | Antietam Creek | Antietam Creek                         | Surface stream  | Antietam Creek                           | Spring | 37100 | 1546  |                     | 7.8E+00 | 6.5E+03 | 56%     | 123120   |          |            |               |                       |                                    |                |

|     |    |                |                     |                |                     |                |        |       |         |         |      |        |          |        |                                    |
|-----|----|----------------|---------------------|----------------|---------------------|----------------|--------|-------|---------|---------|------|--------|----------|--------|------------------------------------|
| 207 | SW | Surface stream | Chattahoochee River | Surface stream | Chattahoochee River | Surface stream | 16000  | 7813  | 1.1E+01 | 1.4E+05 | 70%  | 17388  | 2.86E-04 | 79503  | Jobson, 1996 and references herein |
| 208 | SW | Surface stream | Chattahoochee River | Surface stream | Chattahoochee River | Surface stream | 27900  | 7813  | 8.4E+00 | 1.8E+05 | 105% | 29088  | 1.83E-04 | 82871  | Jobson, 1996 and references herein |
| 209 | SW | Surface stream | Chattahoochee River | Surface stream | Chattahoochee River | Surface stream | 36500  | 7813  | 7.3E+00 | 1.7E+05 | 97%  | 37188  | 1.69E-04 | 84802  | Jobson, 1996 and references herein |
| 210 | SW | Surface stream | Chattahoochee River | Surface stream | Chattahoochee River | Surface stream | 46800  | 7813  | 7.0E+00 | 1.6E+05 | 100% | 34560  | 1.17E-04 | 80432  | Jobson, 1996 and references herein |
| 211 | SW | Surface stream | Chattahoochee River | Surface stream | Chattahoochee River | Surface stream | 57100  | 7813  | 4.4E+00 | 1.1E+05 | 74%  | 71388  | 8.10E-05 | 69107  | Jobson, 1996 and references herein |
| 212 | SW | Surface stream | Chattahoochee River | Surface stream | Chattahoochee River | Surface stream | 60500  | 7813  | 3.9E+00 | 1.1E+05 | 84%  | 77400  | 6.39E-05 | 67335  | Jobson, 1996 and references herein |
| 213 | SW | Surface stream | Chattahoochee River | Surface stream | Chattahoochee River | Surface stream | 76600  | 7813  | 3.2E+00 | 1.1E+05 | 93%  | 103752 | 4.73E-05 | 63789  | Jobson, 1996 and references herein |
| 214 | SW | Surface stream | Chattahoochee River | Surface stream | Chattahoochee River | Surface stream | 10500  | 6218  | 1.6E+01 | 1.4E+05 | 88%  | 9360   | 4.03E-04 | 96923  | Jobson, 1996 and references herein |
| 215 | SW | Surface stream | Chattahoochee River | Surface stream | Chattahoochee River | Surface stream | 10500  | 6218  | 7.0E+00 | 1.4E+05 | 100% | 34560  | 1.60E-04 | 75200  | Jobson, 1996 and references herein |
| 216 | SW | Surface stream | Chattahoochee River | Surface stream | Chattahoochee River | Surface stream | 65400  | 6218  | 3.9E+00 | 1.4E+05 | 98%  | 79776  | 8.87E-05 | 70830  | Jobson, 1996 and references herein |
| 217 | SW | Surface stream | Chattahoochee River | Surface stream | Chattahoochee River | Surface stream | 104600 | 6218  | 2.2E+00 | 1.4E+05 | 98%  | 137988 | 4.94E-05 | 65494  | Jobson, 1996 and references herein |
| 218 | SW | Surface stream | Salt Creek          | Surface stream | Salt Creek          | Surface stream | 9300   | 910   | 5.2E+01 | 2.5E+03 | 82%  | 27900  | 1.74E-04 | 28800  | Jobson, 1996 and references herein |
| 219 | SW | Surface stream | Salt Creek          | Surface stream | Salt Creek          | Surface stream | 13300  | 910   | 1.4E+01 | 2.6E+03 | 84%  | 45000  | 1.15E-04 | 29376  | Jobson, 1996 and references herein |
| 220 | SW | Surface stream | Salt Creek          | Surface stream | Salt Creek          | Surface stream | 13300  | 910   | 1.4E+01 | 3.0E+03 | 65%  | 90000  | 7.06E-05 | 30048  | Jobson, 1996 and references herein |
| 221 | SW | Surface stream | Salt Creek          | Surface stream | Salt Creek          | Surface stream | 44600  | 910   | 8.2E+00 | 3.0E+03 | 57%  | 135000 | 4.71E-05 | 28544  | Jobson, 1996 and references herein |
| 222 | SW | Surface stream | Salt Creek          | Surface stream | Salt Creek          | Surface stream | 51800  | 910   | 3.8E+00 | 4.1E+03 | 51%  | 172800 | 3.38E-05 | 25900  | Jobson, 1996 and references herein |
| 223 | SW | Surface stream | Difficult Run       | Surface stream | Difficult Run       | Surface stream | 600    | 24    | 1.1E+01 | 1.0E+03 | 103% | 4320   | 4.64E-04 | 12000  | Jobson, 1996 and references herein |
| 224 | SW | Surface stream | Difficult Run       | Surface stream | Difficult Run       | Surface stream | 2200   | 24    | 5.5E+00 | 1.0E+03 | 97%  | 13680  | 2.34E-04 | 13895  | Jobson, 1996 and references herein |
| 225 | SW | Surface stream | Difficult Run       | Surface stream | Difficult Run       | Surface stream | 3200   | 24    | 4.1E+00 | 1.1E+03 | 107% | 23220  | 1.74E-04 | 12387  | Jobson, 1996 and references herein |
| 226 | SW | Surface stream | Bear Creek          | Surface stream | Bear Creek          | Surface stream | 1100   | 101   | 4.1E+01 | 1.0E+04 | 96%  | 792    | 4.35E-03 | 120000 | Jobson, 1996 and references herein |
| 227 | SW | Surface stream | Bear Creek          | Surface stream | Bear Creek          | Surface stream | 6000   | 101   | 8.7E+00 | 1.0E+04 | 69%  | 6768   | 1.31E-03 | 76596  | Jobson, 1996 and references herein |
| 228 | SW | Surface stream | Bear Creek          | Surface stream | Bear Creek          | Surface stream | 10900  | 101   | 6.5E+00 | 1.1E+04 | 65%  | 12960  | 1.04E-03 | 72667  | Jobson, 1996 and references herein |
| 229 | SW | Surface stream | LtI Piny Creek      | Surface stream | LtI Piny Creek      | Surface stream | 600    | 48    | 2.9E+01 | 1.4E+03 | 97%  | 3060   | 8.73E-04 | 16841  | Jobson, 1996 and references herein |
| 230 | SW | Surface stream | LtI Piny Creek      | Surface stream | LtI Piny Creek      | Surface stream | 3200   | 48    | 4.5E+00 | 1.4E+03 | 95%  | 18360  | 1.38E-04 | 16000  | Jobson, 1996 and references herein |
| 231 | SW | Surface stream | LtI Piny Creek      | Surface stream | LtI Piny Creek      | Surface stream | 5200   | 48    | 3.1E+00 | 1.6E+03 | 99%  | 26640  | 1.06E-04 | 16865  | Jobson, 1996 and references herein |
| 232 | SW | Surface stream | LtI Piny Creek      | Surface stream | LtI Piny Creek      | Surface stream | 7300   | 48    | 2.3E+00 | 1.6E+03 | 100% | 43200  | 7.51E-05 | 14600  | Jobson, 1996 and references herein |
| 233 | SW | Surface stream | Bayou Anacosa       | Surface stream | Bayou Anacosa       | Surface stream | 11400  | 953   | 3.5E+01 | 2.0E+03 | 90%  | 72000  | 8.11E-05 | 13680  | Jobson, 1996 and references herein |
| 234 | SW | Surface stream | Bayou Anacosa       | Surface stream | Bayou Anacosa       | Surface stream | 22200  | 953   | 1.3E+01 | 2.6E+03 | 82%  | 154800 | 4.28E-05 | 12949  | Jobson, 1996 and references herein |
| 235 | SW | Surface stream | Bayou Anacosa       | Surface stream | Bayou Anacosa       | Surface stream | 953    | 953   | 1.4E+01 | 2.7E+03 | 75%  | 189720 | 3.96E-05 | 13571  | Jobson, 1996 and references herein |
| 236 | SW | Surface stream | Bayou Anacosa       | Surface stream | Bayou Anacosa       | Surface stream | 38000  | 953   | 7.9E+00 | 2.7E+03 | 61%  | 247320 | 3.68E-05 | 13275  | Jobson, 1996 and references herein |
| 237 | SW | Surface stream | Comite River        | Surface stream | Comite River        | Surface stream | 6800   | 1668  | 1.9E+02 | 8.0E+02 | 123% | 85320  | 7.61E-05 | 6886   | Jobson, 1996 and references herein |
| 238 | SW | Surface stream | Comite River        | Surface stream | Comite River        | Surface stream | 26900  | 1668  | 3.2E+01 | 9.0E+02 | 60%  | 313920 | 2.89E-05 | 7404   | Jobson, 1996 and references herein |
| 239 | SW | Surface stream | Comite River        | Surface stream | Comite River        | Surface stream | 48000  | 1668  | 1.9E+01 | 1.0E+03 | 44%  | 392400 | 2.61E-05 | 10569  | Jobson, 1996 and references herein |
| 240 | SW | Surface stream | Comite River        | Surface stream | Comite River        | Surface stream | 1668   | 1668  | 4.8E+01 | 1.8E+03 | 81%  | 449280 | 2.28E-05 | 13184  | Jobson, 1996 and references herein |
| 241 | SW | Surface stream | Comite River        | Surface stream | Comite River        | Surface stream | 78900  | 1668  | 7.2E+01 | 1.0E+03 | 24%  | 507600 | 1.81E-05 | 13430  | Jobson, 1996 and references herein |
| 242 | SW | Surface stream | Bayou Bartholomew   | Surface stream | Bayou Bartholomew   | Surface stream | 3200   | 2817  | 8.2E+01 | 4.1E+03 | 81%  | 20700  | 1.47E-04 | 13357  | Jobson, 1996 and references herein |
| 243 | SW | Surface stream | Bayou Bartholomew   | Surface stream | Bayou Bartholomew   | Surface stream | 25700  | 2817  | 1.4E+01 | 4.8E+03 | 84%  | 221400 | 2.89E-05 | 10029  | Jobson, 1996 and references herein |
| 244 | SW | Surface stream | Bayou Bartholomew   | Surface stream | Bayou Bartholomew   | Surface stream | 59500  | 2817  | 6.8E+00 | 6.5E+03 | 84%  | 442800 | 1.85E-05 | 11610  | Jobson, 1996 and references herein |
| 245 | SW | Surface stream | Bayou Bartholomew   | Surface stream | Bayou Bartholomew   | Surface stream | 117000 | 2817  | 4.3E+00 | 8.1E+03 | 85%  | 844200 | 6.60E-06 | 10000  | Jobson, 1996 and references herein |
| 246 | SW | Surface stream | Amite River         | Surface stream | Amite River         | Surface stream | 10100  | 4288  | 4.0E+01 | 5.7E+03 | 82%  | 50040  | 6.49E-05 | 17439  | Jobson, 1996 and references herein |
| 247 | SW | Surface stream | Amite River         | Surface stream | Amite River         | Surface stream | 38800  | 4288  | 5.1E+00 | 7.4E+03 | 51%  | 206100 | 1.70E-05 | 16266  | Jobson, 1996 and references herein |
| 248 | SW | Surface stream | Amite River         | Surface stream | Amite River         | Surface stream | 94100  | 4288  | 2.4E+00 | 9.9E+03 | 34%  | 386280 | 1.61E-05 | 21048  | Jobson, 1996 and references herein |
| 249 | SW | Surface stream | Amite River         | Surface stream | Amite River         | Surface stream | 148100 | 4288  | 1.9E+00 | 9.9E+03 | 42%  | 447300 | 9.30E-06 | 28607  | Jobson, 1996 and references herein |
| 250 | SW | Surface stream | Tickfau River       | Surface stream | Tickfau River       | Surface stream | 6500   | 1191  | 1.1E+01 | 2.0E+03 | 83%  | 40320  | 1.02E-04 | 13714  | Jobson, 1996 and references herein |
| 251 | SW | Surface stream | Tickfau River       | Surface stream | Tickfau River       | Surface stream | 22500  | 1191  | 1.5E+01 | 2.2E+03 | 76%  | 195120 | 3.69E-05 | 9963   | Jobson, 1996 and references herein |
| 252 | SW | Surface stream | Tickfau River       | Surface stream | Tickfau River       | Surface stream | 38600  | 1191  | 1.0E+01 | 1.9E+03 | 56%  | 313200 | 2.86E-05 | 10648  | Jobson, 1996 and references herein |
| 253 | SW | Surface stream | Tickfau River       | Surface stream | Tickfau River       | Surface stream | 49900  | 1191  | 8.8E+00 | 2.9E+03 | 78%  | 378000 | 2.73E-05 | 11406  | Jobson, 1996 and references herein |
| 254 | SW | Surface stream | Tangipahoa River    | Surface stream | Tangipahoa River    | Surface stream | 8200   | 4764  | 1.2E+02 | 5.8E+03 | 119% | 35100  | 1.27E-04 | 20185  | Jobson, 1996 and references herein |
| 255 | SW | Surface stream | Tangipahoa River    | Surface stream | Tangipahoa River    | Surface stream | 4764   | 4764  | 6.2E+01 | 9.8E+03 | 137% | 76680  | 1.09E-04 | 20282  | Jobson, 1996 and references herein |
| 256 | SW | Surface stream | Tangipahoa River    | Surface stream | Tangipahoa River    | Surface stream | 41500  | 4764  | 2.3E+01 | 1.2E+04 | 105% | 126000 | 5.57E-05 | 28457  | Jobson, 1996 and references herein |
| 257 | SW | Surface stream | Tangipahoa River    | Surface stream | Tangipahoa River    | Surface stream | 55400  | 4764  | 1.8E+01 | 1.2E+04 | 95%  | 162000 | 5.08E-05 | 29547  | Jobson, 1996 and references herein |
| 258 | SW | Surface stream | Tangipahoa River    | Surface stream | Tangipahoa River    | Surface stream | 71000  | 4764  | 1.4E+01 | 1.4E+04 | 105% | 204480 | 4.12E-05 | 30000  | Jobson, 1996 and references herein |
| 259 | SW | Surface stream | Tangipahoa River    | Surface stream | Tangipahoa River    | Surface stream | 82100  | 4764  | 9.7E+00 | 1.8E+04 | 89%  | 237600 | 4.06E-05 | 28655  | Jobson, 1996 and references herein |
| 260 | SW | Surface stream | Tangipahoa River    | Surface stream | Tangipahoa River    | Surface stream | 82100  | 4764  | 8.8E+00 | 1.8E+04 | 89%  | 237600 | 4.06E-05 | 28655  | Jobson, 1996 and references herein |
| 261 | SW | Surface stream | Tangipahoa River    | Surface stream | Tangipahoa River    | Surface stream | 8200   | 3811  | 3.8E+01 | 3.5E+03 | 102% | 49500  | 7.44E-05 | 14313  | Jobson, 1996 and references herein |
| 262 | SW | Surface stream | Tangipahoa River    | Surface stream | Tangipahoa River    | Surface stream | 18000  | 3811  | 4.2E+01 | 4.6E+03 | 97%  | 108000 | 5.15E-05 | 14400  | Jobson, 1996 and references herein |
| 263 | SW | Surface stream | Tangipahoa River    | Surface stream | Tangipahoa River    | Surface stream | 41500  | 3811  | 1.6E+01 | 6.9E+03 | 80%  | 169200 | 3.69E-05 | 21191  | Jobson, 1996 and references herein |
| 264 | SW | Surface stream | Tangipahoa River    | Surface stream | Tangipahoa River    | Surface stream | 55400  | 3811  | 1.3E+01 | 8.1E+03 | 86%  | 212400 | 3.27E-05 | 22536  | Jobson, 1996 and references herein |
| 265 | SW | Surface stream | Tangipahoa River    | Surface stream | Tangipahoa River    | Surface stream | 71000  | 3811  | 1.1E+01 | 8.6E+03 | 87%  | 246600 | 3.32E-05 | 23184  | Jobson, 1996 and references herein |
| 266 | SW | Surface stream | Tangipahoa River    | Surface stream | Tangipahoa River    | Surface stream | 82100  | 3811  | 8.6E+00 | 9.0E+03 | 66%  | 298800 | 3.08E-05 | 23740  | Jobson, 1996 and references herein |
| 267 | SW | Surface stream | Tangipahoa River    | Surface stream | Tangipahoa River    | Surface stream | 94000  | 3811  | 7.3E+00 | 1.1E+04 | 70%  | 347400 | 2.99E-05 | 23378  | Jobson, 1996 and references herein |
| 268 | SW | Surface stream | Red River           | Surface stream | Red River           | Surface stream | 5700   | 23440 | 2.1E+01 | 2.4E+05 | 74%  | 9000   | 2.90E-04 | 54720  | Jobson, 1996 and references herein |
| 269 | SW | Surface stream | Red River           | Surface stream | Red River           | Surface stream | 75600  | 23440 | 4.0E+00 | 2.5E+05 | 74%  | 120600 | 5.66E-05 | 94161  | Jobson, 1996 and references herein |
| 270 | SW | Surface stream | Red River           | Surface stream | Red River           | Surface stream | 23440  | 23440 | 2.3E+01 | 2.4E+05 | 74%  | 9000   | 2.90E-04 | 53120  | Jobson, 1996 and references herein |
| 271 | SW | Surface stream | Red River           | Surface stream | Red River           | Surface stream | 193100 | 23440 | 1.5E+00 | 2.5E+05 | 59%  | 333000 | 2.72E-05 | 50102  | Jobson, 1996 and references herein |
| 272 | SW | Surface stream | Red River           | Surface stream | Red River           | Surface stream | 8000   | 13673 | 2.1E+01 | 1.4E+05 | 120% | 12060  | 1.78E-04 | 57313  | Jobson, 1996 and references herein |
| 273 | SW | Surface stream | Red River           | Surface stream | Red River           | Surface stream | 54700  | 13673 | 3.2E+00 | 1.4E+05 | 81%  | 115200 | 4.08E-05 | 41025  | Jobson, 1996 and references herein |
| 274 | SW | Surface stream | Red River           | Surface stream | Red River           | Surface stream | 103000 | 13673 | 2.6E+00 | 1.7E+05 | 85%  | 187200 | 3.76E-05 | 47538  | Jobson, 1996 and references herein |
| 275 | SW | Surface stream | Red River           | Surface stream | Red River           | Surface stream | 159300 | 13673 | 1.5E+00 | 1.8E+05 | 77%  | 315000 | 2.63E-05 | 43694  | Jobson, 1996 and references herein |
| 276 | SW | Surface stream | Red River           | Surface stream | Red River           | Surface stream | 8000   | 18199 | 2.2E+01 | 1.9E+05 | 134% | 17100  | 1.72E-04 | 40421  | Jobson, 1996 and references herein |
| 277 | SW | Surface stream | Red River           | Surface stream | Red River           | Surface stream | 54700  | 18199 | 4.6E+00 | 1.9E+05 | 104% | 120600 | 4.54E-05 | 39188  | Jobson, 1996 and references herein |
| 278 | SW | Surface stream | Red River           | Surface stream | Red River           | Surface stream | 103000 | 18199 | 2.7E+00 | 2.4E+05 | 92%  | 195300 | 3.76E-05 | 45567  | Jobson, 1996 and references herein |
| 279 | SW | Surface stream | Red River           | Surface stream | Red River           | Surface stream | 159300 | 18199 | 1.7E+00 | 2.5E+05 | 85%  | 306900 | 2.77E-05 | 44847  | Jobson, 1996 and references herein |
| 280 | SW | Surface stream | Red River           | Surface stream | Red River           | Surface stream | 12100  | 18199 | 6.2E+01 | 1.1E+05 | 87%  | 25200  | 1.82E-04 | 11486  | Jobson, 1996 and references herein |
| 281 | SW | Surface stream | Red River           | Surface stream | Red River           | Surface stream | 82100  | 18199 | 5.5E+00 | 1.1E+05 | 76%  | 162000 | 4.52E-05 | 43787  | Jobson, 1996 and references herein |
| 282 | SW | Surface stream | Red River           | Surface stream | Red River           | Surface stream | 18199  | 18199 | 2.6E+00 | 1.4E+05 | 62%  | 286200 | 3.13E-05 | 42023  | Jobson, 1996 and references herein |
| 283 | SW | Surface stream | Red River           | Surface stream | Red River           | Surface stream | 199600 | 18199 | 2.4E+00 | 1.7E+05 | 82%  | 439200 | 2.66E-05 | 39266  | Jobson, 1996 and references herein |
| 284 | SW | Surface stream | Sabine River        | Surface stream | Sabine River        | Surface stream | 7900   | 4621  | 1.0E+01 | 1.3E+05 | 82%  | 9000   | 3.51E-04 | 57840  | Jobson, 1996 and references herein |
| 285 | SW | Surface stream | Sabine River        | Surface stream | Sabine River        | Surface stream | 17200  | 4621  | 1.1E+01 | 1.4E+05 |      |        |          |        |                                    |

|     |    |                |                    |                |                    |                |        |         |         |         |      |        |          |        |                                    |
|-----|----|----------------|--------------------|----------------|--------------------|----------------|--------|---------|---------|---------|------|--------|----------|--------|------------------------------------|
| 311 | SW | Surface stream | Mississippi River  | Surface stream | Mississippi River  | Surface stream | 54700  | 108960  | 3.7E+00 | 6.8E-06 | 97%  | 36900  | 2.38E-04 | 128078 | Jobson, 1996 and references herein |
| 312 | SW | Surface stream | Mississippi River  | Surface stream | Mississippi River  | Surface stream | 96600  | 108960  | 1.7E+00 | 6.8E-06 | 84%  | 63900  | 1.23E-04 | 130614 | Jobson, 1996 and references herein |
| 313 | SW | Surface stream | Mississippi River  | Surface stream | Mississippi River  | Surface stream | 118000 | 108960  | 1.0E+00 | 6.8E-06 | 111% | 82900  | 5.63E-05 | 121310 | Jobson, 1996 and references herein |
| 314 | SW | Surface stream | Mississippi River  | Surface stream | Mississippi River  | Surface stream | 204500 | 108960  | 3.4E+01 | 6.8E-06 | 59%  | 195300 | 3.62E-05 | 130296 | Jobson, 1996 and references herein |
| 315 | SW | Surface stream | Wind/Bighorn River | Surface stream | Wind/Bighorn River | Surface stream | 9200   | 3904    | 2.6E+01 | 5.5E-04 | 107% | 9900   | 3.46E-04 | 80291  | Jobson, 1996 and references herein |
| 316 | SW | Surface stream | Wind/Bighorn River | Surface stream | Wind/Bighorn River | Surface stream | 32700  | 3904    | 1.2E+01 | 5.5E-04 | 93%  | 33768  | 1.79E-04 | 83667  | Jobson, 1996 and references herein |
| 317 | SW | Surface stream | Wind/Bighorn River | Surface stream | Wind/Bighorn River | Surface stream | 50400  | 3904    | 8.3E+00 | 5.7E-04 | 91%  | 59868  | 1.32E-04 | 72736  | Jobson, 1996 and references herein |
| 318 | SW | Surface stream | Wind/Bighorn River | Surface stream | Wind/Bighorn River | Surface stream | 75300  | 3904    | 6.1E+00 | 5.7E-04 | 84%  | 90000  | 1.05E-04 | 72288  | Jobson, 1996 and references herein |
| 319 | SW | Surface stream | Wind/Bighorn River | Surface stream | Wind/Bighorn River | Surface stream | 99900  | 3904    | 5.1E+00 | 5.7E-04 | 83%  | 117468 | 9.17E-05 | 72478  | Jobson, 1996 and references herein |
| 320 | SW | Surface stream | Wind/Bighorn River | Surface stream | Wind/Bighorn River | Surface stream | 141900 | 3904    | 4.3E+00 | 5.7E-04 | 77%  | 160200 | 8.14E-05 | 76530  | Jobson, 1996 and references herein |
| 321 | SW | Surface stream | Wind/Bighorn River | Surface stream | Wind/Bighorn River | Surface stream | 181400 | 3904    | 3.0E+00 | 6.9E-04 | 75%  | 201600 | 7.10E-05 | 77743  | Jobson, 1996 and references herein |
| 322 | SW | Surface stream | Wind/Bighorn River | Surface stream | Wind/Bighorn River | Surface stream | 9200   | 3700    | 1.2E+01 | 2.3E-05 | 112% | 5184   | 6.60E-04 | 153333 | Jobson, 1996 and references herein |
| 323 | SW | Surface stream | Wind/Bighorn River | Surface stream | Wind/Bighorn River | Surface stream | 32700  | 3700    | 5.8E+00 | 2.4E-05 | 112% | 17568  | 3.27E-04 | 160820 | Jobson, 1996 and references herein |
| 324 | SW | Surface stream | Wind/Bighorn River | Surface stream | Wind/Bighorn River | Surface stream | 50400  | 3700    | 2.9E+00 | 2.4E-05 | 83%  | 32112  | 2.24E-04 | 139513 | Jobson, 1996 and references herein |
| 325 | SW | Surface stream | Wind/Bighorn River | Surface stream | Wind/Bighorn River | Surface stream | 75300  | 3700    | 2.0E+00 | 2.2E-05 | 80%  | 48600  | 1.52E-04 | 133867 | Jobson, 1996 and references herein |
| 326 | SW | Surface stream | Wind/Bighorn River | Surface stream | Wind/Bighorn River | Surface stream | 99900  | 3700    | 1.5E+00 | 2.2E-05 | 68%  | 65088  | 1.30E-04 | 132611 | Jobson, 1996 and references herein |
| 327 | SW | Surface stream | Wind/Bighorn River | Surface stream | Wind/Bighorn River | Surface stream | 141900 | 3700    | 1.2E+00 | 2.2E-05 | 57%  | 93600  | 1.23E-04 | 130985 | Jobson, 1996 and references herein |
| 328 | SW | Surface stream | Wind/Bighorn River | Surface stream | Wind/Bighorn River | Surface stream | 181400 | 3700    | 8.2E-01 | 2.5E-05 | 52%  | 139412 | 1.09E-04 | 131251 | Jobson, 1996 and references herein |
| 329 | SW | Surface stream | Copper Creek       | Surface stream | Copper Creek       | Surface stream | 200    | 67000   | 3.9E+05 | 1.6E+03 | 104% | 504    | 4.26E-03 | 34286  | Jobson, 1996 and references herein |
| 330 | SW | Surface stream | Copper Creek       | Surface stream | Copper Creek       | Surface stream | 1000   | 67000   | 2.1E+04 | 1.6E+03 | 96%  | 3168   | 5.30E-04 | 27273  | Jobson, 1996 and references herein |
| 331 | SW | Surface stream | Copper Creek       | Surface stream | Copper Creek       | Surface stream | 1700   | 67000   | 1.4E+04 | 1.6E+03 | 84%  | 5400   | 3.93E-04 | 27200  | Jobson, 1996 and references herein |
| 332 | SW | Surface stream | Copper Creek       | Surface stream | Copper Creek       | Surface stream | 2400   | 67000   | 1.2E+04 | 1.6E+03 | 89%  | 7344   | 3.32E-04 | 28235  | Jobson, 1996 and references herein |
| 333 | SW | Surface stream | Copper Creek       | Surface stream | Copper Creek       | Surface stream | 3300   | 67000   | 9.0E+03 | 1.6E+03 | 91%  | 12096  | 2.38E-04 | 25571  | Jobson, 1996 and references herein |
| 334 | SW | Surface stream | Copper Creek       | Surface stream | Copper Creek       | Surface stream | 4100   | 67000   | 7.6E+03 | 1.6E+03 | 128% | 15336  | 1.43E-04 | 23009  | Jobson, 1996 and references herein |
| 335 | SW | Surface stream | Clinch River       | Surface stream | Clinch River       | Surface stream | 700    | 744000  | 1.4E+05 | 1.1E+04 | 105% | 1692   | 1.97E-03 | 35745  | Jobson, 1996 and references herein |
| 336 | SW | Surface stream | Clinch River       | Surface stream | Clinch River       | Surface stream | 1600   | 744000  | 8.7E+04 | 9.1E+03 | 111% | 4500   | 1.05E-03 | 30720  | Jobson, 1996 and references herein |
| 337 | SW | Surface stream | Clinch River       | Surface stream | Clinch River       | Surface stream | 2500   | 744000  | 5.2E+04 | 9.5E+03 | 106% | 6840   | 6.28E-04 | 33333  | Jobson, 1996 and references herein |
| 338 | SW | Surface stream | Clinch River       | Surface stream | Clinch River       | Surface stream | 3600   | 744000  | 4.2E+04 | 1.1E+04 | 120% | 9540   | 4.97E-04 | 26204  | Jobson, 1996 and references herein |
| 339 | SW | Surface stream | Clinch River       | Surface stream | Clinch River       | Surface stream | 4700   | 744000  | 2.9E+04 | 1.1E+04 | 111% | 13824  | 3.18E-04 | 23925  | Jobson, 1996 and references herein |
| 340 | SW | Surface stream | Clinch River       | Surface stream | Clinch River       | Surface stream | 5900   | 744000  | 1.6E+04 | 9.8E+03 | 108% | 20520  | 1.95E-04 | 24842  | Jobson, 1996 and references herein |
| 341 | SW | Surface stream | Copper Creek       | Surface stream | Copper Creek       | Surface stream | 700    | 64000   | 4.7E+04 | 6.0E+03 | 90%  | 6264   | 8.29E-04 | 9655   | Jobson, 1996 and references herein |
| 342 | SW | Surface stream | Copper Creek       | Surface stream | Copper Creek       | Surface stream | 2200   | 64000   | 1.3E+04 | 1.0E+03 | 77%  | 13824  | 2.64E-04 | 13750  | Jobson, 1996 and references herein |
| 343 | SW | Surface stream | Copper Creek       | Surface stream | Copper Creek       | Surface stream | 3300   | 64000   | 7.6E+03 | 1.0E+03 | 59%  | 20700  | 1.99E-04 | 13774  | Jobson, 1996 and references herein |
| 344 | SW | Surface stream | Copper Creek       | Surface stream | Copper Creek       | Surface stream | 4500   | 64000   | 6.0E+03 | 1.0E+03 | 65%  | 26532  | 1.58E-04 | 13781  | Jobson, 1996 and references herein |
| 345 | SW | Surface stream | Copper Creek       | Surface stream | Copper Creek       | Surface stream | 6500   | 64000   | 5.6E+03 | 1.1E+03 | 74%  | 35100  | 1.30E-04 | 16000  | Jobson, 1996 and references herein |
| 346 | SW | Surface stream | Copper Creek       | Surface stream | Copper Creek       | Surface stream | 8400   | 64000   | 3.6E+03 | 1.1E+03 | 52%  | 43848  | 1.18E-04 | 16552  | Jobson, 1996 and references herein |
| 347 | SW | Surface stream | Powell River       | Surface stream | Powell River       | Surface stream | 1000   | 260000  | 2.3E+04 | 4.1E+03 | 86%  | 5256   | 4.18E-04 | 16438  | Jobson, 1996 and references herein |
| 348 | SW | Surface stream | Powell River       | Surface stream | Powell River       | Surface stream | 1700   | 260000  | 1.6E+04 | 4.6E+03 | 116% | 10512  | 2.46E-04 | 13973  | Jobson, 1996 and references herein |
| 349 | SW | Surface stream | Powell River       | Surface stream | Powell River       | Surface stream | 2600   | 260000  | 1.0E+03 | 4.8E+03 | 80%  | 17568  | 1.40E-04 | 13920  | Jobson, 1996 and references herein |
| 350 | SW | Surface stream | Powell River       | Surface stream | Powell River       | Surface stream | 4800   | 260000  | 5.6E+03 | 3.9E+03 | 93%  | 27360  | 9.00E-05 | 15158  | Jobson, 1996 and references herein |
| 351 | SW | Surface stream | Powell River       | Surface stream | Powell River       | Surface stream | 6200   | 260000  | 4.0E+03 | 4.0E+03 | 71%  | 35676  | 8.70E-05 | 15015  | Jobson, 1996 and references herein |
| 352 | SW | Surface stream | Clinch River       | Surface stream | Clinch River       | Surface stream | 900    | 377000  | 4.7E+04 | 5.8E+03 | 77%  | 3348   | 9.50E-04 | 23226  | Jobson, 1996 and references herein |
| 353 | SW | Surface stream | Clinch River       | Surface stream | Clinch River       | Surface stream | 1900   | 377000  | 1.9E+04 | 6.1E+03 | 73%  | 7200   | 4.35E-04 | 22800  | Jobson, 1996 and references herein |
| 354 | SW | Surface stream | Clinch River       | Surface stream | Clinch River       | Surface stream | 2700   | 377000  | 1.5E+04 | 5.9E+03 | 78%  | 13140  | 2.22E-04 | 21609  | Jobson, 1996 and references herein |
| 355 | SW | Surface stream | Clinch River       | Surface stream | Clinch River       | Surface stream | 4500   | 377000  | 6.5E+03 | 5.7E+03 | 68%  | 17460  | 1.44E-04 | 22268  | Jobson, 1996 and references herein |
| 356 | SW | Surface stream | Clinch River       | Surface stream | Clinch River       | Surface stream | 5600   | 377000  | 4.4E+03 | 5.1E+03 | 57%  | 27144  | 1.04E-04 | 17825  | Jobson, 1996 and references herein |
| 357 | SW | Surface stream | Clinch River       | Surface stream | Clinch River       | Surface stream | 6600   | 377000  | 3.5E+03 | 5.9E+03 | 62%  | 33624  | 8.70E-05 | 16959  | Jobson, 1996 and references herein |
| 358 | SW | Surface stream | Copper Creek       | Surface stream | Copper Creek       | Surface stream | 200    | 450000  | 5.8E+05 | 7.1E+03 | 113% | 252    | 8.08E-03 | 68571  | Jobson, 1996 and references herein |
| 359 | SW | Surface stream | Copper Creek       | Surface stream | Copper Creek       | Surface stream | 4500   | 450000  | 1.0E+05 | 7.8E+03 | 121% | 1260   | 1.48E-03 | 68571  | Jobson, 1996 and references herein |
| 360 | SW | Surface stream | Copper Creek       | Surface stream | Copper Creek       | Surface stream | 1700   | 450000  | 5.8E+04 | 7.9E+03 | 116% | 2340   | 8.76E-04 | 62769  | Jobson, 1996 and references herein |
| 361 | SW | Surface stream | Copper Creek       | Surface stream | Copper Creek       | Surface stream | 2400   | 450000  | 4.0E+04 | 7.6E+03 | 99%  | 3240   | 6.86E-04 | 64000  | Jobson, 1996 and references herein |
| 362 | SW | Surface stream | Copper Creek       | Surface stream | Copper Creek       | Surface stream | 3300   | 450000  | 2.6E+04 | 8.1E+03 | 93%  | 5148   | 4.94E-04 | 55385  | Jobson, 1996 and references herein |
| 363 | SW | Surface stream | Copper Creek       | Surface stream | Copper Creek       | Surface stream | 4100   | 450000  | 2.1E+04 | 8.7E+03 | 90%  | 6228   | 4.50E-04 | 56879  | Jobson, 1996 and references herein |
| 364 | SW | Surface stream | Clinch River       | Surface stream | Clinch River       | Surface stream | 700    | 377000  | 4.8E+05 | 1.0E+04 | 105% | 648    | 7.18E-03 | 83333  | Jobson, 1996 and references herein |
| 365 | SW | Surface stream | Clinch River       | Surface stream | Clinch River       | Surface stream | 1600   | 377000  | 1.6E+05 | 1.1E+05 | 171% | 1368   | 2.58E-03 | 101053 | Jobson, 1996 and references herein |
| 366 | SW | Surface stream | Clinch River       | Surface stream | Clinch River       | Surface stream | 2500   | 377000  | 1.6E+05 | 1.0E+05 | 207% | 2304   | 2.18E-03 | 93750  | Jobson, 1996 and references herein |
| 367 | SW | Surface stream | Clinch River       | Surface stream | Clinch River       | Surface stream | 3600   | 377000  | 9.2E+04 | 1.1E+05 | 157% | 3312   | 1.71E-03 | 93913  | Jobson, 1996 and references herein |
| 368 | SW | Surface stream | Clinch River       | Surface stream | Clinch River       | Surface stream | 4700   | 377000  | 5.2E+04 | 1.1E+05 | 126% | 4644   | 1.14E-03 | 87442  | Jobson, 1996 and references herein |
| 369 | SW | Surface stream | Clinch River       | Surface stream | Clinch River       | Surface stream | 5900   | 377000  | 4.3E+04 | 1.0E+05 | 159% | 6012   | 7.30E-04 | 84780  | Jobson, 1996 and references herein |
| 370 | SW | Surface stream | Coachella Canal    | Surface stream | Coachella Canal    | Surface stream | 300    | 1580000 | 8.8E+05 | 2.6E+04 | 86%  | 396    | 1.66E-02 | 65455  | Jobson, 1996 and references herein |
| 371 | SW | Surface stream | Coachella Canal    | Surface stream | Coachella Canal    | Surface stream | 900    | 1580000 | 5.2E+05 | 2.5E+04 | 118% | 1260   | 7.10E-03 | 61714  | Jobson, 1996 and references herein |
| 372 | SW | Surface stream | Coachella Canal    | Surface stream | Coachella Canal    | Surface stream | 1800   | 1580000 | 3.2E+05 | 2.5E+04 | 129% | 2556   | 4.01E-03 | 60845  | Jobson, 1996 and references herein |
| 373 | SW | Surface stream | Coachella Canal    | Surface stream | Coachella Canal    | Surface stream | 2700   | 1580000 | 2.0E+05 | 2.6E+04 | 110% | 3780   | 3.01E-03 | 61714  | Jobson, 1996 and references herein |
| 374 | SW | Surface stream | Coachella Canal    | Surface stream | Coachella Canal    | Surface stream | 4500   | 1580000 | 7.2E+04 | 2.8E+04 | 85%  | 7776   | 1.38E-03 | 61111  | Jobson, 1996 and references herein |
| 375 | SW | Surface stream | Coachella Canal    | Surface stream | Coachella Canal    | Surface stream | 300    | 1210000 | 7.4E+05 | 2.7E+04 | 150% | 396    | 1.09E-02 | 65455  | Jobson, 1996 and references herein |
| 376 | SW | Surface stream | Coachella Canal    | Surface stream | Coachella Canal    | Surface stream | 900    | 1210000 | 2.8E+05 | 2.7E+04 | 94%  | 1188   | 6.76E-03 | 65455  | Jobson, 1996 and references herein |
| 377 | SW | Surface stream | Coachella Canal    | Surface stream | Coachella Canal    | Surface stream | 1800   | 1210000 | 1.4E+05 | 2.7E+04 | 115% | 3780   | 2.64E-03 | 41143  | Jobson, 1996 and references herein |
| 378 | SW | Surface stream | Coachella Canal    | Surface stream | Coachella Canal    | Surface stream | 2700   | 1210000 | 8.4E+04 | 2.7E+04 | 98%  | 5544   | 1.89E-03 | 42078  | Jobson, 1996 and references herein |
| 379 | SW | Surface stream | Coachella Canal    | Surface stream | Coachella Canal    | Surface stream | 4000   | 1210000 | 4.4E+04 | 2.7E+04 | 77%  | 7704   | 1.28E-03 | 44860  | Jobson, 1996 and references herein |
| 380 | SW | Surface stream | Coachella Canal    | Surface stream | Coachella Canal    | Surface stream | 5500   | 1210000 | 1.8E+04 | 2.7E+04 | 92%  | 26820  | 4.46E-04 | 17718  | Jobson, 1996 and references herein |
| 381 | SW | Surface stream | Clinch River       | Surface stream | Clinch River       | Surface stream | 700    | 2450000 | 4.0E+05 | 8.6E+04 | 198% | 576    | 7.05E-03 | 105000 | Jobson, 1996 and references herein |
| 382 | SW | Surface stream | Clinch River       | Surface stream | Clinch River       | Surface stream | 1600   | 2450000 | 1.9E+05 | 8.0E+04 | 204% | 1548   | 2.98E-03 | 89302  | Jobson, 1996 and references herein |
| 383 | SW | Surface stream | Clinch River       | Surface stream | Clinch River       | Surface stream | 2500   | 2450000 | 1.2E+05 | 8.9E+04 | 219% | 2736   | 1.95E-03 | 78947  | Jobson, 1996 and references herein |
| 384 | SW | Surface stream | Clinch River       | Surface stream | Clinch River       | Surface stream | 3600   | 2450000 | 8.5E+04 | 8.7E-04 | 212% | 4104   | 1.42E-03 | 75789  | Jobson, 1996 and references herein |
| 385 | SW | Surface stream | Clinch River       | Surface stream | Clinch River       | Surface stream | 4700   | 2450000 | 5.6E+04 | 8.4E-04 | 199% | 5004   | 9.70E-04 | 81151  | Jobson, 1996 and references herein |
| 386 | SW | Surface stream | Clinch River       | Surface stream | Clinch River       | Surface stream | 5900   | 2450000 | 3.1E+04 | 8.5E-04 | 190% | 7596   | 5.59E-04 | 67109  | Jobson, 1996 and references herein |
| 387 | SW | Surface stream | Copper Creek       | Surface stream | Copper Creek       | Surface stream | 200    | 112000  | 3.4E+05 | 1.8E+03 | 100% | 612    | 5.45E-03 | 28235  | Jobson, 1996 and references herein |
| 388 | SW | Surface stream | Copper Creek       | Surface stream | Copper Creek       | Surface stream | 1000   | 112000  | 3.9E+04 | 1.8E+03 | 100% | 3240   | 6.30E-04 | 26667  | Jobson, 1996 and references herein |
| 389 | SW | Surface stream | Copper Creek       | Surface stream | Copper Creek       | Surface stream | 2000   | 112000  | 4.8E+04 | 1.8E+03 | 170% | 6480   | 4.50E-04 | 26842  | Jobson, 1996 and references herein |
| 390 | SW | Surface stream | Copper Creek       |                |                    |                |        |         |         |         |      |        |          |        |                                    |

|     |    |                |                           |                |                           |                |        |       |         |          |         |          |       |                                    |
|-----|----|----------------|---------------------------|----------------|---------------------------|----------------|--------|-------|---------|----------|---------|----------|-------|------------------------------------|
| 415 | SW | Surface stream | Monocacy River            | Surface stream | Monocacy River            | Surface stream | 18300  | 1237  | 0.0E+00 | 2.0E+03  | 194400  | 1.53E-05 | 8133  | Jobson, 1996 and references herein |
| 416 | SW | Surface stream | Monocacy River            | Surface stream | Monocacy River            | Surface stream | 26800  | 1237  | 0.0E+00 | 2.3E+03  | 273600  | 8.80E-06 | 8463  | Jobson, 1996 and references herein |
| 417 | SW | Surface stream | Souris River              | Surface stream | Souris River              | Surface stream | 2700   | 222   | 8.4E+00 | 4.0E+02  | 168300  | 1.38E-05 | 1386  | Jobson, 1996 and references herein |
| 418 | SW | Surface stream | Souris River              | Surface stream | Souris River              | Surface stream | 2800   | 222   | 5.9E+00 | 4.0E+02  | 234900  | 1.34E-05 | 1471  | Jobson, 1996 and references herein |
| 419 | SW | Surface stream | Souris River              | Surface stream | Souris River              | Surface stream | 1800   | 168   | 1.6E+01 | 3.0E+02  | 83700   | 3.70E-05 | 1858  | Jobson, 1996 and references herein |
| 420 | SW | Surface stream | Souris River              | Surface stream | Souris River              | Surface stream | 3200   | 168   | 1.2E+01 | 3.0E+02  | 179100  | 2.97E-05 | 1544  | Jobson, 1996 and references herein |
| 421 | SW | Surface stream | Souris River              | Surface stream | Souris River              | Surface stream | 2100   | 168   | 1.3E+01 | 6.0E+02  | 61200   | 5.55E-05 | 2965  | Jobson, 1996 and references herein |
| 422 | SW | Surface stream | Souris River              | Surface stream | Souris River              | Surface stream | 14600  | 168   | 3.8E+00 | 9.0E+02  | 215100  | 2.59E-05 | 5864  | Jobson, 1996 and references herein |
| 423 | SW | Surface stream | Souris River              | Surface stream | Souris River              | Surface stream | 1400   | 173   | 5.6E+01 | 1.8E+03  | 20700   | 1.45E-04 | 5843  | Jobson, 1996 and references herein |
| 424 | SW | Surface stream | Souris River              | Surface stream | Souris River              | Surface stream | 6400   | 173   | 1.4E+01 | 7.0E+02  | 83988   | 7.27E-05 | 6584  | Jobson, 1996 and references herein |
| 425 | SW | Surface stream | Souris River              | Surface stream | Souris River              | Surface stream | 14200  | 173   | 8.3E+00 | 8.0E+02  | 160200  | 5.14E-05 | 7658  | Jobson, 1996 and references herein |
| 426 | SW | Surface stream | Souris River              | Surface stream | Souris River              | Surface stream | 1600   | 182   | 2.2E+01 | 1.3E+03  | 17100   | 1.77E-04 | 8084  | Jobson, 1996 and references herein |
| 427 | SW | Surface stream | Souris River              | Surface stream | Souris River              | Surface stream | 10500  | 182   | 5.1E+00 | 1.3E+03  | 125100  | 4.26E-05 | 7252  | Jobson, 1996 and references herein |
| 428 | SW | Surface stream | New River                 | Surface stream | New River                 | Surface stream | 2100   | 400   | 3.1E+02 | 1.0E+02  | 48600   | 6.05E-05 | 4622  | Jobson, 1996 and references herein |
| 429 | SW | Surface stream | New River                 | Surface stream | New River                 | Surface stream | 13500  | 400   | 5.0E+01 | 1.0E+02  | 259200  | 1.61E-05 | 4500  | Jobson, 1996 and references herein |
| 430 | SW | Surface stream | Flint River               | Surface stream | Flint River               | Surface stream | 4200   | 1800  | 1.5E+02 | 1.5E+03  | 19188   | 2.26E-04 | 18912 | Jobson, 1996 and references herein |
| 431 | SW | Surface stream | Flint River               | Surface stream | Flint River               | Surface stream | 18300  | 1800  | 1.9E+01 | 3.9E+03  | 94968   | 2.78E-05 | 16649 | Jobson, 1996 and references herein |
| 432 | SW | Surface stream | Flint River               | Surface stream | Flint River               | Surface stream | 35900  | 1800  | 1.2E+01 | 5.2E+03  | 177840  | 3.14E-05 | 17441 | Jobson, 1996 and references herein |
| 433 | SW | Surface stream | Flint River               | Surface stream | Flint River               | Surface stream | 64500  | 1800  | 6.1E+00 | 6.3E+03  | 274888  | 1.88E-05 | 20083 | Jobson, 1996 and references herein |
| 434 | SW | Surface stream | Flint River               | Surface stream | Flint River               | Surface stream | 500    | 360   | 6.9E+01 | 2.2E+03  | 5292    | 6.24E-04 | 8163  | Jobson, 1996 and references herein |
| 435 | SW | Surface stream | Flint River               | Surface stream | Flint River               | Surface stream | 1700   | 360   | 1.3E+01 | 2.3E+03  | 19728   | 1.05E-04 | 7445  | Jobson, 1996 and references herein |
| 436 | SW | Surface stream | Flint River               | Surface stream | Flint River               | Surface stream | 3500   | 360   | 2.7E+00 | 2.4E+03  | 74988   | 1.75E-05 | 4073  | Jobson, 1996 and references herein |
| 437 | SW | Surface stream | Flint River               | Surface stream | Flint River               | Surface stream | 4400   | 360   | 2.0E+00 | 2.4E+03  | 102168  | 1.50E-05 | 4721  | Jobson, 1996 and references herein |
| 438 | SW | Surface stream | Hoosic, Route 346         | Surface stream | Hoosic, Route 346         | Surface stream | 3100   | 3800  | 1.1E+02 | 6.5E+03  | 10440   | 3.12E-04 | 26655 | Jobson, 1996 and references herein |
| 439 | SW | Surface stream | Hoosic, Route 11          | Surface stream | Hoosic, Route 11          | Surface stream | 8400   | 3800  | 2.5E+01 | 6.3E+03  | 25920   | 1.05E-04 | 28000 | Jobson, 1996 and references herein |
| 440 | SW | Surface stream | Hoosic, Route 7           | Surface stream | Hoosic, Route 7           | Surface stream | 13600  | 3800  | 2.2E+01 | 6.7E+03  | 39240   | 5.18E-05 | 29945 | Jobson, 1996 and references herein |
| 441 | SW | Surface stream | Hoosic, Route 22          | Surface stream | Hoosic, Route 22          | Surface stream | 19500  | 3800  | 1.1E+01 | 6.9E+03  | 56052   | 6.15E-05 | 30058 | Jobson, 1996 and references herein |
| 442 | SW | Surface stream | Shenandoah, Waynesboro    | Surface stream | Shenandoah, Waynesboro    | Surface stream | 2300   | 2400  | 5.5E+02 | 1.0E+03  | 14400   | 2.12E-04 | 13800 | Jobson, 1996 and references herein |
| 443 | SW | Surface stream | Shenandoah, Waynesboro    | Surface stream | Shenandoah, Waynesboro    | Surface stream | 4400   | 2400  | 3.9E+02 | 3.15E-04 | 6480    | 3.15E-04 | 9967  | Jobson, 1996 and references herein |
| 444 | SW | Surface stream | Shenandoah, Hopeman       | Surface stream | Shenandoah, Hopeman       | Surface stream | 10800  | 2400  | 6.6E+01 | 1.6E+03  | 93600   | 5.40E-05 | 9969  | Jobson, 1996 and references herein |
| 445 | SW | Surface stream | Shenandoah, Hopeman       | Surface stream | Shenandoah, Hopeman       | Surface stream | 10800  | 4540  | 7.4E+01 | 3.7E+03  | 46800   | 6.82E-05 | 19938 | Jobson, 1996 and references herein |
| 446 | SW | Surface stream | Shenandoah, Crimora       | Surface stream | Shenandoah, Crimora       | Surface stream | 22700  | 2400  | 3.4E+01 | 1.8E+03  | 187200  | 3.32E-05 | 10477 | Jobson, 1996 and references herein |
| 447 | SW | Surface stream | Shenandoah, Crimora       | Surface stream | Shenandoah, Crimora       | Surface stream | 22700  | 4540  | 4.2E+01 | 4.5E+03  | 98280   | 4.71E-05 | 19956 | Jobson, 1996 and references herein |
| 448 | SW | Surface stream | Shenandoah, Harrison      | Surface stream | Shenandoah, Harrison      | Surface stream | 3300   | 4540  | 2.9E+02 | 1.9E+03  | 270000  | 2.57E-05 | 21600 | Jobson, 1996 and references herein |
| 449 | SW | Surface stream | Shenandoah, Harrison      | Surface stream | Shenandoah, Harrison      | Surface stream | 33000  | 4540  | 2.9E+01 | 4.8E+03  | 139680  | 3.70E-05 | 20412 | Jobson, 1996 and references herein |
| 450 | SW | Surface stream | Shenandoah, Island Ford   | Surface stream | Shenandoah, Island Ford   | Surface stream | 60000  | 2400  | 2.5E+00 | 7.7E+03  | 471600  | 1.60E-05 | 10992 | Jobson, 1996 and references herein |
| 451 | SW | Surface stream | Shenandoah, Island Ford   | Surface stream | Shenandoah, Island Ford   | Surface stream | 60000  | 4540  | 3.9E+00 | 1.9E-04  | 238680  | 2.43E-05 | 21719 | Jobson, 1996 and references herein |
| 452 | SW | Surface stream | Shenandoah, Shenandoah    | Surface stream | Shenandoah, Shenandoah    | Surface stream | 81800  | 2400  | 1.5E+00 | 9.3E-04  | 622800  | 1.26E-05 | 13348 | Jobson, 1996 and references herein |
| 453 | SW | Surface stream | Shenandoah, Shenandoah    | Surface stream | Shenandoah, Shenandoah    | Surface stream | 81800  | 4540  | 1.8E+00 | 1.6E-04  | 325980  | 2.16E-05 | 21741 | Jobson, 1996 and references herein |
| 454 | SW | Surface stream | Shenandoah, Shenandoah    | Surface stream | Shenandoah, Shenandoah    | Surface stream | 11300  | 6810  | 3.2E+01 | 2.4E-04  | 38880   | 1.04E-04 | 25111 | Jobson, 1996 and references herein |
| 455 | SW | Surface stream | Shenandoah, Grove Hill    | Surface stream | Shenandoah, Grove Hill    | Surface stream | 94500  | 2400  | 1.4E+00 | 1.1E-04  | 694800  | 1.19E-05 | 11751 | Jobson, 1996 and references herein |
| 456 | SW | Surface stream | Shenandoah, Grove Hill    | Surface stream | Shenandoah, Grove Hill    | Surface stream | 12700  | 7000  | 5.2E+01 | 9.5E+03  | 61200   | 6.27E-05 | 17929 | Jobson, 1996 and references herein |
| 457 | SW | Surface stream | Shenandoah, Grove Hill    | Surface stream | Shenandoah, Grove Hill    | Surface stream | 24000  | 6810  | 1.7E+01 | 2.3E-04  | 75600   | 6.29E-05 | 27429 | Jobson, 1996 and references herein |
| 458 | SW | Surface stream | Shenandoah, US Hwy 211    | Surface stream | Shenandoah, US Hwy 211    | Surface stream | 46900  | 7000  | 4.1E+01 | 3.1E-04  | 226800  | 1.92E-05 | 14057 | Jobson, 1996 and references herein |
| 459 | SW | Surface stream | Shenandoah, US Hwy 211    | Surface stream | Shenandoah, US Hwy 211    | Surface stream | 36900  | 6810  | 8.4E+00 | 2.4E-04  | 153000  | 4.01E-05 | 20838 | Jobson, 1996 and references herein |
| 460 | SW | Surface stream | Shenandoah, Bixler Bridge | Surface stream | Shenandoah, Bixler Bridge | Surface stream | 48100  | 7000  | 5.3E+00 | 1.1E-04  | 414000  | 8.90E-06 | 10038 | Jobson, 1996 and references herein |
| 461 | SW | Surface stream | Shenandoah, Bixler Bridge | Surface stream | Shenandoah, Bixler Bridge | Surface stream | 59400  | 6810  | 4.7E+00 | 2.3E-04  | 216000  | 2.08E-05 | 23760 | Jobson, 1996 and references herein |
| 462 | SW | Surface stream | Shenandoah, Bentonsville  | Surface stream | Shenandoah, Bentonsville  | Surface stream | 90100  | 7000  | 4.8E+00 | 1.3E-04  | 705600  | 9.00E-06 | 11033 | Jobson, 1996 and references herein |
| 463 | SW | Surface stream | Shenandoah, Bentonsville  | Surface stream | Shenandoah, Bentonsville  | Surface stream | 101400 | 7000  | 3.0E+00 | 2.5E-04  | 354000  | 1.45E-05 | 24707 | Jobson, 1996 and references herein |
| 464 | SW | Surface stream | Shenandoah, Bentonsville  | Surface stream | Shenandoah, Bentonsville  | Surface stream | 42000  | 13620 | 2.8E+01 | 2.9E-04  | 120600  | 6.23E-05 | 30090 | Jobson, 1996 and references herein |
| 465 | SW | Surface stream | Shenandoah, Front Royal   | Surface stream | Shenandoah, Front Royal   | Surface stream | 114900 | 7000  | 4.0E+00 | 1.3E-04  | 885600  | 7.30E-06 | 11210 | Jobson, 1996 and references herein |
| 466 | SW | Surface stream | Shenandoah, Front Royal   | Surface stream | Shenandoah, Front Royal   | Surface stream | 66800  | 13620 | 1.6E+01 | 2.9E-04  | 201600  | 4.50E-05 | 20629 | Jobson, 1996 and references herein |
| 467 | SW | Surface stream | Shenandoah, Morgan Ford   | Surface stream | Shenandoah, Morgan Ford   | Surface stream | 131300 | 7000  | 1.6E+00 | 1.8E-04  | 1051200 | 5.80E-06 | 8792  | Jobson, 1996 and references herein |
| 468 | SW | Surface stream | Shenandoah, Morgan Ford   | Surface stream | Shenandoah, Morgan Ford   | Surface stream | 6900   | 7000  | 4.1E+00 | 1.8E-04  | 82800   | 2.65E-05 | 8243  | Jobson, 1996 and references herein |
| 469 | SW | Surface stream | Shenandoah, Morgan Ford   | Surface stream | Shenandoah, Morgan Ford   | Surface stream | 83200  | 13620 | 3.1E+00 | 4.3E-04  | 275400  | 3.73E-05 | 26102 | Jobson, 1996 and references herein |
| 470 | SW | Surface stream | Shenandoah, HWWY 17850    | Surface stream | Shenandoah, HWWY 17850    | Surface stream | 25400  | 3000  | 9.8E+00 | 1.5E-04  | 208800  | 2.20E-05 | 10510 | Jobson, 1996 and references herein |
| 471 | SW | Surface stream | Shenandoah, HWWY 17850    | Surface stream | Shenandoah, HWWY 17850    | Surface stream | 100700 | 13620 | 7.1E+00 | 4.3E-04  | 325800  | 2.91E-05 | 26705 | Jobson, 1996 and references herein |
| 472 | SW | Surface stream | Shenandoah, HWWY 17850    | Surface stream | Shenandoah, HWWY 17850    | Surface stream | 17500  | 9080  | 1.9E+01 | 4.9E-04  | 45720   | 1.07E-04 | 38071 | Jobson, 1996 and references herein |
| 473 | SW | Surface stream | Shenandoah, HWY 7         | Surface stream | Shenandoah, HWY 7         | Surface stream | 48800  | 3000  | 3.1E+00 | 2.8E-04  | 320400  | 1.98E-05 | 13160 | Jobson, 1996 and references herein |
| 474 | SW | Surface stream | Shenandoah, HWY 7         | Surface stream | Shenandoah, HWY 7         | Surface stream | 40900  | 9080  | 9.2E+00 | 4.9E-04  | 99720   | 5.77E-05 | 35437 | Jobson, 1996 and references herein |
| 475 | SW | Surface stream | Shenandoah, HWY 9         | Surface stream | Shenandoah, HWY 9         | Surface stream | 70800  | 3000  | 2.2E+00 | 1.7E-04  | 457200  | 1.59E-05 | 13380 | Jobson, 1996 and references herein |
| 476 | SW | Surface stream | Shenandoah, HWY 9         | Surface stream | Shenandoah, HWY 9         | Surface stream | 62900  | 9080  | 5.6E+00 | 4.8E-04  | 71000   | 3.37E-05 | 31781 | Jobson, 1996 and references herein |
| 477 | SW | Surface stream | Shenandoah, Harpers Ferry | Surface stream | Shenandoah, Harpers Ferry | Surface stream | 83000  | 3000  | 1.7E+00 | 1.6E-04  | 594000  | 1.45E-05 | 12073 | Jobson, 1996 and references herein |
| 478 | SW | Surface stream | Shenandoah, Harpers Ferry | Surface stream | Shenandoah, Harpers Ferry | Surface stream | 9800   | 9080  | 4.9E+00 | 4.4E-04  | 84000   | 2.63E-05 | 29110 | Jobson, 1996 and references herein |
| 479 | SW | Surface stream | Potomac, Cumberland       | Surface stream | Potomac, Cumberland       | Surface stream | 3500   | 4960  | 2.2E+02 | 6.9E+03  | 17280   | 3.35E-04 | 17500 | Jobson, 1996 and references herein |
| 480 | SW | Surface stream | Potomac, North Branch     | Surface stream | Potomac, North Branch     | Surface stream | 17500  | 4960  | 2.0E+01 | 7.2E+03  | 113400  | 3.83E-05 | 13333 | Jobson, 1996 and references herein |
| 481 | SW | Surface stream | Potomac, Oldtown          | Surface stream | Potomac, Oldtown          | Surface stream | 31500  | 4960  | 1.4E+01 | 7.9E+03  | 181800  | 2.76E-05 | 14970 | Jobson, 1996 and references herein |
| 482 | SW | Surface stream | Potomac, Paw Paw          | Surface stream | Potomac, Paw Paw          | Surface stream | 48800  | 4960  | 1.8E+00 | 1.3E-04  | 268200  | 2.26E-05 | 15721 | Jobson, 1996 and references herein |
| 483 | SW | Surface stream | Potomac, Doe Gully        | Surface stream | Potomac, Doe Gully        | Surface stream | 80600  | 4960  | 4.7E+00 | 1.2E-04  | 428400  | 1.56E-05 | 16255 | Jobson, 1996 and references herein |
| 484 | SW | Surface stream | Potomac, Hancock          | Surface stream | Potomac, Hancock          | Surface stream | 109800 | 4960  | 3.4E+00 | 1.5E-04  | 568800  | 8.90E-06 | 16678 | Jobson, 1996 and references herein |
| 485 | SW | Surface stream | Potomac, Hancock          | Surface stream | Potomac, Hancock          | Surface stream | 6600   | 3040  | 3.6E+01 | 1.6E-04  | 32400   | 1.66E-04 | 17600 | Jobson, 1996 and references herein |
| 486 | SW | Surface stream | Potomac, Fort Frederick   | Surface stream | Potomac, Fort Frederick   | Surface stream | 25100  | 3040  | 8.0E+00 | 1.7E-04  | 120600  | 5.00E-05 | 17982 | Jobson, 1996 and references herein |
| 487 | SW | Surface stream | Potomac, Dam#3            | Surface stream | Potomac, Dam#3            | Surface stream | 40700  | 3040  | 1.2E+00 | 1.6E-04  | 480000  | 6.00E-06 | 7236  | Jobson, 1996 and references herein |
| 488 | SW | Surface stream | Potomac, Williamsport     | Surface stream | Potomac, Williamsport     | Surface stream | 51300  | 3040  | 9.0E+01 | 2.8E-04  | 597000  | 5.10E-06 | 7417  | Jobson, 1996 and references herein |
| 489 | SW | Surface stream | Potomac, Williamsport     | Surface stream | Potomac, Williamsport     | Surface stream | 9700   | 6060  | 3.2E+01 | 2.0E-04  | 86400   | 9.55E-05 | 9700  | Jobson, 1996 and references herein |
| 490 | SW | Surface stream | Potomac, Dam#4            | Surface stream | Potomac, Dam#4            | Surface stream | 34600  | 6060  | 1.3E+00 | 2.0E-04  | 601200  | 5.00E-06 | 4972  | Jobson, 1996 and references herein |
| 491 | SW | Surface stream | Potomac, Shepherdstown    | Surface stream | Potomac, Shepherdstown    | Surface stream | 7300   | 10000 | 1.1E+00 | 2.0E-04  | 238400  | 4.50E-06 | 6313  | Jobson, 1996 and references herein |
| 492 | SW | Surface stream | Potomac, Shepherdstown    | Surface stream | Potomac, Shepherdstown    | Surface stream | 52000  | 6060  | 3.1E+01 | 3.2E-04  | 55440   | 9.93E-05 | 11221 | Jobson, 1996 and references herein |
| 493 | SW | Surface stream | Potomac, Dam#3            | Surface stream | Potomac, Dam#3            | Surface stream | 22400  | 2900  | 7.3E+00 | 2.2E-04  | 238400  | 2.36E-05 | 8698  | Jobson, 1996 and references herein |
| 494 | SW | Surface stream | Potomac, Brunswick        | Surface stream | Potomac, Brunswick        | Surface stream | 35900  | 10000 | 6.0E+00 | 4.1E-04  | 284400  | 2.15E-05 | 10906 | Jobson, 19                         |

|     |    |                |                              |                |                              |                |       |       |                  |         |         |        |          |       |                                    |       |            |                          |
|-----|----|----------------|------------------------------|----------------|------------------------------|----------------|-------|-------|------------------|---------|---------|--------|----------|-------|------------------------------------|-------|------------|--------------------------|
| 519 | SW | Surface stream | Elkhorn C, near Emerson      | Surface stream | Elkhorn C, near Emerson      | Surface stream | 64900 | 800   | 6.8E+00          | 3.6E+03 | 46%     | 230040 | 6.64E-05 | 24376 | Jobson, 1996 and references herein |       |            |                          |
| 520 | SW | Surface stream | Elkhorn C, near Haldane      | Surface stream | Elkhorn C, near Haldane      | Surface stream | 1600  | 200   | 3.5E+02          | 2.0E+02 | 86%     | 11880  | 4.07E-04 | 11636 | Jobson, 1996 and references herein |       |            |                          |
| 521 | SW | Surface stream | Elkhorn C, near Millegewille | Surface stream | Elkhorn C, near Millegewille | Surface stream | 20900 | 200   | 1.5E+01          | 7.0E+02 | 42%     | 113600 | 1.21E-04 | 10381 | Jobson, 1996 and references herein |       |            |                          |
| 522 | SW | Surface stream | Elkhorn C, near Penrose      | Surface stream | Elkhorn C, near Penrose      | Surface stream | 68800 | 200   | 3.6E+00          | 1.5E+03 | 47%     | 24300  | 5.82E-05 | 16640 | Jobson, 1996 and references herein |       |            |                          |
| 523 | SW | Surface stream | Elkhorn C, near Emerson      | Surface stream | Elkhorn C, near Emerson      | Surface stream | 64900 | 200   | 2.0E+00          | 1.9E+03 | 43%     | 313200 | 4.33E-05 | 17903 | Jobson, 1996 and references herein |       |            |                          |
| 524 | SW | Surface stream | Embarras R,Greenup           | Surface stream | Embarras R,Greenup           | Surface stream | 2400  | 1600  | 4.8E+01          | 2.8E+04 | 85%     | 3312   | 9.78E-04 | 62609 | Jobson, 1996 and references herein |       |            |                          |
| 525 | SW | Surface stream | Embarras R, Ste Marie        | Surface stream | Embarras R, Ste Marie        | Surface stream | 67300 | 1600  | 5.0E+00          | 2.8E-04 | 83%     | 120960 | 1.05E-04 | 48071 | Jobson, 1996 and references herein |       |            |                          |
| 526 | SW | Surface stream | Embarras R, Greenup          | Surface stream | Embarras R, Greenup          | Surface stream | 2400  | 1000  | 6.0E+01          | 8.9E+03 | 112%    | 5760   | 4.79E-04 | 36000 | Jobson, 1996 and references herein |       |            |                          |
| 527 | SW | Surface stream | Embarras R, Rose Hill        | Surface stream | Embarras R, Rose Hill        | Surface stream | 26400 | 200   | 1.0E+01          | 8.7E+03 | 92%     | 77760  | 9.70E-05 | 29313 | Jobson, 1996 and references herein |       |            |                          |
| 528 | SW | Surface stream | Embarras R, Newton           | Surface stream | Embarras R, Newton           | Surface stream | 48800 | 1000  | 5.7E+00          | 9.4E+03 | 83%     | 147240 | 6.46E-05 | 28636 | Jobson, 1996 and references herein |       |            |                          |
| 529 | SW | Surface stream | Embarras R, Greenup          | Surface stream | Embarras R, Greenup          | Surface stream | 2400  | 500   | 6.3E+01          | 1.2E+03 | 96%     | 18000  | 1.58E-04 | 11520 | Jobson, 1996 and references herein |       |            |                          |
| 530 | SW | Surface stream | Embarras R, Rose Hill        | Surface stream | Embarras R, Rose Hill        | Surface stream | 26400 | 500   | 1.1E+01          | 1.5E+03 | 64%     | 209520 | 5.08E-05 | 10887 | Jobson, 1996 and references herein |       |            |                          |
| 531 | SW | Surface stream | Embarras R, Falmouth         | Surface stream | Embarras R, Falmouth         | Surface stream | 37300 | 500   | 5.8E+00          | 1.9E+03 | 70%     | 288000 | 3.17E-05 | 11190 | Jobson, 1996 and references herein |       |            |                          |
| 532 | SW | Surface stream | Embarras R, Newton           | Surface stream | Embarras R, Newton           | Surface stream | 48800 | 1000  | 4.4E+00          | 1.9E+03 | 47%     | 375840 | 2.93E-05 | 12128 | Jobson, 1996 and references herein |       |            |                          |
| 533 | SW | Surface stream | Kaskaskia R, Bondville       | Surface stream | Kaskaskia R, Bondville       | Surface stream | 3200  | 300   | 5.4E+02          | 1.0E+02 | 46%     | 14040  | 3.95E-04 | 19692 | Jobson, 1996 and references herein |       |            |                          |
| 534 | SW | Surface stream | Kaskaskia R, Grange          | Surface stream | Kaskaskia R, Grange          | Surface stream | 26700 | 300   | 9.2E+00          | 1.0E+03 | 42%     | 94320  | 7.29E-05 | 24458 | Jobson, 1996 and references herein |       |            |                          |
| 535 | SW | Surface stream | Kaskaskia R, Ficklin         | Surface stream | Kaskaskia R, Ficklin         | Surface stream | 42600 | 300   | 4.3E+00          | 1.7E+03 | 44%     | 148680 | 5.51E-05 | 24755 | Jobson, 1996 and references herein |       |            |                          |
| 536 | SW | Surface stream | Kaskaskia R, Bondville       | Surface stream | Kaskaskia R, Bondville       | Surface stream | 3200  | 300   | 1.1E+03          | 1.0E+02 | 90%     | 15840  | 3.93E-04 | 17455 | Jobson, 1996 and references herein |       |            |                          |
| 537 | SW | Surface stream | Kaskaskia R, Peotium         | Surface stream | Kaskaskia R, Peotium         | Surface stream | 3200  | 300   | 7.4E+00          | 3.1E+03 | 114%    | 111960 | 6.74E-05 | 20200 | Jobson, 1996 and references herein |       |            |                          |
| 538 | SW | Surface stream | Kaskaskia R, Chesterville    | Surface stream | Kaskaskia R, Chesterville    | Surface stream | 60500 | 300   | 6.5E+01          | 8.6E+03 | 71%     | 221760 | 2.64E-05 | 23571 | Jobson, 1996 and references herein |       |            |                          |
| 539 | SW | Surface stream | Kaskaskia R, Bondville       | Surface stream | Kaskaskia R, Bondville       | Surface stream | 1600  | 250   | -                | -       | -       | 3740   | 8.90E-05 | 3692  | Jobson, 1996 and references herein |       |            |                          |
| 540 | SW | Surface stream | Kaskaskia R, Hayes           | Surface stream | Kaskaskia R, Hayes           | Surface stream | 36700 | 250   | 2.9E+00          | 1.0E+03 | 49%     | 218160 | 2.37E-05 | 14535 | Jobson, 1996 and references herein |       |            |                          |
| 541 | SW | Surface stream | MacKinaw R, MacKinaw         | Surface stream | MacKinaw R, MacKinaw         | Surface stream | 1900  | 2400  | 3.1E+02          | 1.6E-04 | 112%    | 3960   | 7.94E-04 | 41455 | Jobson, 1996 and references herein |       |            |                          |
| 542 | SW | Surface stream | MacKinaw R, Green Valley     | Surface stream | MacKinaw R, Green Valley     | Surface stream | 4900  | 2400  | 3.2E+00          | 3.3E-04 | 69%     | 85320  | 1.81E-04 | 50532 | Jobson, 1996 and references herein |       |            |                          |
| 543 | SW | Surface stream | MacKinaw R, MacKinaw         | Surface stream | MacKinaw R, MacKinaw         | Surface stream | 1900  | 1800  | 7.1E+01          | 1.1E-04 | 81%     | 5040   | 5.38E-04 | 32571 | Jobson, 1996 and references herein |       |            |                          |
| 544 | SW | Surface stream | MacKinaw R, Green Valley     | Surface stream | MacKinaw R, Green Valley     | Surface stream | 49900 | 1800  | 6.7E+00          | 1.1E-04 | 50%     | 117720 | 7.92E-05 | 36624 | Jobson, 1996 and references herein |       |            |                          |
| 545 | SW | Surface stream | MacKinaw R, MacKinaw         | Surface stream | MacKinaw R, MacKinaw         | Surface stream | 1900  | 500   | 2.5E+01          | 1.0E+03 | 80%     | 28080  | 6.28E-05 | 5846  | Jobson, 1996 and references herein |       |            |                          |
| 546 | SW | Surface stream | MacKinaw R, Tremont          | Surface stream | MacKinaw R, Tremont          | Surface stream | 10300 | 500   | 7.8E+00          | 1.3E+03 | 59%     | 104400 | 3.42E-05 | 8524  | Jobson, 1996 and references herein |       |            |                          |
| 547 | SW | Surface stream | MF Vermilion R, Armstrong    | Surface stream | MF Vermilion R, Armstrong    | Surface stream | 4800  | 1000  | 7.6E+00          | 8.7E+03 | 97%     | 11160  | 3.91E-04 | 37461 | Jobson, 1996 and references herein |       |            |                          |
| 548 | SW | Surface stream | MF Vermilion R, Oakwood      | Surface stream | MF Vermilion R, Oakwood      | Surface stream | 50700 | 1000  | 7.2E+00          | 5.6E+03 | 65%     | 122040 | 6.52E-05 | 35894 | Jobson, 1996 and references herein |       |            |                          |
| 549 | SW | Surface stream | MF Vermilion R, Armstrong    | Surface stream | MF Vermilion R, Armstrong    | Surface stream | 4800  | 3000  | 2.6E+01          | 1.3E+03 | 79%     | 31320  | 1.21E-04 | 13241 | Jobson, 1996 and references herein |       |            |                          |
| 550 | SW | Surface stream | MF Vermilion R, Oakwood      | Surface stream | MF Vermilion R, Oakwood      | Surface stream | 50700 | 300   | 1.6E+00          | 1.4E+03 | 50%     | 370800 | 1.53E-05 | 11814 | Jobson, 1996 and references herein |       |            |                          |
| 551 | SW | Surface stream | Sangamon R, Mahomet          | Surface stream | Sangamon R, Mahomet          | Surface stream | 3100  | 500   | 4.3E+01          | 3.5E+03 | 80%     | 9360   | 3.80E-04 | 28615 | Jobson, 1996 and references herein |       |            |                          |
| 552 | SW | Surface stream | Sangamon R, Monticello       | Surface stream | Sangamon R, Monticello       | Surface stream | 40900 | 500   | 3.2E+00          | 7.8E+03 | 59%     | 144800 | 8.45E-05 | 24571 | Jobson, 1996 and references herein |       |            |                          |
| 553 | SW | Surface stream | Sangamon R, Cisco            | Surface stream | Sangamon R, Cisco            | Surface stream | 60500 | 500   | 1.5E+00          | 8.3E+03 | 28%     | 209520 | 8.89E-05 | 24948 | Jobson, 1996 and references herein |       |            |                          |
| 554 | SW | Surface stream | Sangamon R, near Mahomet     | Surface stream | Sangamon R, near Mahomet     | Surface stream | 5100  | 1600  | 6.2E+01          | 3.6E+03 | 57%     | 18360  | 2.43E-04 | 24000 | Jobson, 1996 and references herein |       |            |                          |
| 555 | SW | Surface stream | Sangamon R, Monticello       | Surface stream | Sangamon R, Monticello       | Surface stream | 40900 | 1600  | 7.8E+00          | 5.7E+03 | 46%     | 176400 | 6.03E-05 | 20033 | Jobson, 1996 and references herein |       |            |                          |
| 556 | SW | Surface stream | Sangamon R, Cisco            | Surface stream | Sangamon R, Cisco            | Surface stream | 60500 | 1600  | 5.1E+00          | 6.7E+03 | 40%     | 267840 | 5.31E-05 | 39516 | Jobson, 1996 and references herein |       |            |                          |
| 557 | SW | Surface stream | Sangamon R, near Mahomet     | Surface stream | Sangamon R, near Mahomet     | Surface stream | 5100  | 400   | 9.3E+01          | 5.0E+02 | 181%    | 97560  | 4.01E-05 | 4517  | Jobson, 1996 and references herein |       |            |                          |
| 558 | SW | Surface stream | Sangamon R, Allerton Pk      | Surface stream | Sangamon R, Allerton Pk      | Surface stream | 47600 | 400   | 3.3E+00          | 9.0E+02 | 41%     | 540000 | 1.79E-05 | 7616  | Jobson, 1996 and references herein |       |            |                          |
| 559 | SW | Surface stream | Shoal Cr, Old Ripley         | Surface stream | Shoal Cr, Old Ripley         | Surface stream | 2700  | 1600  | 1.8E+02          | 5.6E+03 | 84%     | 5760   | 7.64E-04 | 40500 | Jobson, 1996 and references herein |       |            |                          |
| 560 | SW | Surface stream | Shoal Cr, Jamestown          | Surface stream | Shoal Cr, Jamestown          | Surface stream | 29800 | 1600  | 2.7E+01          | 5.9E+03 | 83%     | 95760  | 1.22E-04 | 26887 | Jobson, 1996 and references herein |       |            |                          |
| 561 | SW | Surface stream | Shoal Cr, near Breese        | Surface stream | Shoal Cr, near Breese        | Surface stream | 57000 | 1600  | 1.3E+01          | 3.8E+03 | 66%     | 229680 | 4.67E-05 | 21442 | Jobson, 1996 and references herein |       |            |                          |
| 562 | SW | Surface stream | Shoal Cr, Old Ripley         | Surface stream | Shoal Cr, Old Ripley         | Surface stream | 2700  | 600   | 1.7E+02          | 1.2E+03 | 79%     | 9720   | 4.27E-04 | 24000 | Jobson, 1996 and references herein |       |            |                          |
| 563 | SW | Surface stream | Shoal Cr, Jamestown          | Surface stream | Shoal Cr, Jamestown          | Surface stream | 29800 | 600   | 1.2E+01          | 2.5E+03 | 60%     | 159480 | 8.52E-05 | 16144 | Jobson, 1996 and references herein |       |            |                          |
| 564 | SW | Surface stream | Shoal Cr, Frogtown           | Surface stream | Shoal Cr, Frogtown           | Surface stream | 48800 | 600   | 7.4E+00          | 2.1E+03 | 64%     | 284400 | 4.03E-05 | 14825 | Jobson, 1996 and references herein |       |            |                          |
| 565 | SW | Surface stream | Shoal Cr, Old Ripley         | Surface stream | Shoal Cr, Old Ripley         | Surface stream | 2700  | 400   | 9.7E+01          | 7.0E+02 | 84%     | 16560  | 2.02E-04 | 14087 | Jobson, 1996 and references herein |       |            |                          |
| 566 | SW | Surface stream | Shoal Cr, Jamestown          | Surface stream | Shoal Cr, Jamestown          | Surface stream | 29800 | 400   | 7.8E+00          | 1.3E+03 | 71%     | 266040 | 3.57E-05 | 9678  | Jobson, 1996 and references herein |       |            |                          |
| 567 | SW | Surface stream | Vermilion R, near Leonore    | Surface stream | Vermilion R, near Leonore    | Surface stream | 3500  | 1200  | 2.5E+01          | 4.4E-04 | 93%     | 3960   | 9.78E-04 | 7630  | Jobson, 1996 and references herein |       |            |                          |
| 568 | SW | Surface stream | Vermilion R, Lowell          | Surface stream | Vermilion R, Lowell          | Surface stream | 14300 | 1200  | 5.5E+00          | 4.7E-04 | 87%     | 18360  | 2.44E-04 | 67294 | Jobson, 1996 and references herein |       |            |                          |
| 569 | SW | Surface stream | Vermilion R, near Leonore    | Surface stream | Vermilion R, near Leonore    | Surface stream | 3500  | 600   | 1.8E+01          | 1.4E-04 | 106%    | 7200   | 3.95E-04 | 42000 | Jobson, 1996 and references herein |       |            |                          |
| 570 | SW | Surface stream | Vermilion R, Ogesby          | Surface stream | Vermilion R, Ogesby          | Surface stream | 26900 | 600   | 3.2E+00          | 1.6E-04 | 97%     | 70920  | 8.40E-05 | 32772 | Jobson, 1996 and references herein |       |            |                          |
| 571 | SW | Surface stream | Vermilion R, near Leonore    | Surface stream | Vermilion R, near Leonore    | Surface stream | 3500  | 550   | 1.8E+01          | 2.9E+03 | 76%     | 20160  | 1.25E-04 | 15000 | Jobson, 1996 and references herein |       |            |                          |
| 572 | SW | Surface stream | Vermilion R, Ogesby          | Surface stream | Vermilion R, Ogesby          | Surface stream | 26900 | 1000  | 2.3E+00          | 2.4E+03 | 49%     | 234280 | 2.06E-05 | 10363 | Jobson, 1996 and references herein |       |            |                          |
| 573 | SW | Surface stream | Llanidloes Bridge            | Surface stream | Severn River                 | Surface stream | 217   | 1000  | Rhodamine WT     | 1.1E+03 | 7.3E+03 | 112%   | 383      | 300   | 6.87E-03                           | 60480 | 01/04/1978 | Atkinson and Davis, 2000 |
| 574 | SW | Surface stream | Llanidloes Bridge            | Surface stream | Severn River                 | Surface stream | 110   | 1000  | Rhodamine WT     | 2.3E+02 | 7.0E+03 | 78%    | 1838     | 1560  | 2.02E-03                           | 65077 | 01/04/1978 | Atkinson and Davis, 2000 |
| 575 | SW | Surface stream | Llanidloes Bridge            | Surface stream | Severn River                 | Surface stream | 2875  | 1000  | Rhodamine WT     | 1.1E+02 | 7.2E+03 | 107%   | 4623     | 4020  | 7.43E-04                           | 61791 | 01/04/1978 | Atkinson and Davis, 2000 |
| 576 | SW | Surface stream | Llanidloes Bridge            | Surface stream | Severn River                 | Surface stream | 5275  | 1000  | Rhodamine WT     | 5.8E+01 | 7.5E+03 | 101%   | 9266     | 8880  | 4.33E-04                           | 51324 | 01/04/1978 | Atkinson and Davis, 2000 |
| 577 | SW | Surface stream | Llanidloes Bridge            | Surface stream | Severn River                 | Surface stream | 10275 | 1000  | Rhodamine WT     | 3.5E+01 | 9.3E+03 | 107%   | 14276    | 13440 | 2.97E-04                           | 49992 | 01/04/1978 | Atkinson and Davis, 2000 |
| 578 | SW | Surface stream | Llanidloes Bridge            | Surface stream | Severn River                 | Surface stream | 10275 | 1000  | Rhodamine WT     | 2.1E+01 | 9.8E+03 | 85%    | 19285    | 18120 | 2.46E-04                           | 48993 | 02/04/1978 | Atkinson and Davis, 2000 |
| 579 | SW | Surface stream | Llanidloes Bridge            | Surface stream | Severn River                 | Surface stream | 13775 | 1000  | Rhodamine WT     | 2.0E+01 | 1.0E+04 | 93%    | 23938    | 23533 | 2.15E-04                           | 50574 | 02/04/1978 | Atkinson and Davis, 2000 |
| 580 | SW | Surface stream | Pont de Réals                | Surface stream | Orb River                    | Surface stream | 50    | 19360 | Sulfurhodamine G | 3.3E+02 | 3.0E+01 | 84%    | 3577     | 2770  | 6.14E-04                           | 1560  | 26/10/2006 | Unpublished data         |
| 581 | SW | Surface stream | Pont de Réals                | Surface stream | Orb River                    | Surface stream | 6300  | 19360 | Sulfurhodamine G | 1.0E+02 | 3.1E+01 | 79%    | 13838    | 12040 | 2.09E-04                           | 45209 | 27/10/2006 | Unpublished data         |
| 582 | SW | Surface stream | Pont de Réals                | Surface stream | Orb River                    | Surface stream | 9100  | 19360 | Sulfurhodamine G | 3.9E+01 | 3.1E+01 | 77%    | 32360    | 27890 | 8.01E-05                           | 30669 | 28/10/2006 | Unpublished data         |
| 583 | SW | Surface stream | Pont de Réals                | Surface stream | Orb River                    | Surface stream | 13900 | 19360 | Sulfurhodamine G | 3.2E+01 | 3.1E+01 | 77%    | 45093    | 40680 | 6.64E-05                           | 29522 | 29/10/2006 | Unpublished data         |

## ESM References

Andreu, B., Vadillo, I., Carrasco, F., Neukum, C., Jiménez, P., Goldscheider, N., Nozli, H., Vias, J.M., Pérez, I. y Göppert, N. 2004. Precisiones sobre el funcionamiento hidrodinámico y la vulnerabilidad a la contaminación del acuífero kárstico de la Sierra de Libar (provincias de Málaga y Cádiz, sur de España) a partir de un ensayo de trazadores. *Revista de la Sociedad Geológica de España*, 17 (3-4): 187-197

Arfó, B., Lamarque, T., Masurel, P., Fourmillon, A. 2011. Artificial tracer test through the regional aquifer mixed carbonate-siliciclastic of the Boussett unit (SE France). in: Université de Franche-Comté, U.S.N. (Ed.), 9th conference on limestone hydrology, Besançon, pp. 21-24.

Atkinson, T.C., Davis, P.M., 2000. Longitudinal dispersion in natural channels: I. Experimental results from the River Severn, UK. *Hydro. Earth Syst. Sci.*, 4(3): 345-353.

Becker, M.W., Shapiro, A.M., 2000. Tracer transport in fractured crystalline rock: Evidence of nondiffusive breakthrough tailing. *Water Resources Research*, 36(7): 1677-1686. DOI:10.1029/2000WR000800

de la Bernarde, J., 2013. Etude de la relation entre débits des sources karstiques et distributions des temps de séjour, Mémoire de stage de master 2, Université Pierre et Marie Curie, 50 pp.

Broyere, S., Dassargues, A., Hallet, V., 2004. Migration of contaminants through the unsaturated zone overlying the Hesbaye chalky aquifer in Belgium: a field investigation. *Journal of Contaminant Hydrology*, 72(1-4): 135-164. DOI:http://dx.doi.org/10.1016/j.jconhyd.2003.10.009

Carleton, G.B., Welby, C., Buxton, H.T., 1999. Design and analysis of tracer tests to determine effective porosity and dispersivity in fractured sedimentary rocks, Newark, New Jersey, USGS.

Dzikowski, M., Carlier, E., Crampon, N., de Marsily, G., 1991. Relations entre réponses impulsionnelles et conditions hydrodynamiques des systèmes dans le cadre de traçages artificiels: Theorie et application sur colonne de laboratoire. *Journal of Hydrology*, Volume 125, Issues 1–2, 129-148. doi:10.1016/0022-1694(91)90087-X

Foley, A., Cachand, G., Franklin, J., Willmore, F., Atkinson, T., 2012. Tracer tests and the structure of permeability in the Corallian limestone aquifer of northern England. *UK Hydrogeology Journal*, 20(3): 483-498. DOI:10.1007/s10040-012-0830-x

Freves, A., Montedó, M., Ramoneda, J., 1997. Tracer tests in the Jökis karst system (Aran Valley, Central Pyrenees, NE Spain). In: Kranjč, A. (Ed.), *Tracer Hydrology*, Balkema.

Goldscheider, N., Niemann, J., Prunk, M., Smart, C., 2008. Tracer tests in karst hydrogeology and speleology. *International Journal of Speleology*, 37(1): 17-40.

Jobson, H.E., 1996. Prediction of Travel Time and Longitudinal Dispersion in Rivers and Streams. U.S. Geological Survey Water Resources Investigations Report 96-4013, pp. 30.

Joudi, A., Siazat, S., Binet, S., Brunand, A., Alberic, P., Lepiller, M., 2010. Development of a
